# Supplementary material for: Sasquatch: predicting the impact of regulatory SNPs on transcription factor binding from cell- and tissue-specific DNase footprints
Source: PubMed Central journal article supplement — Genome Res. 2017 Oct;27(10):1730–42. doi: 10.1101/gr.220202.117 (PMC5630036; doi:10.1101/gr.220202.117), 2017-10
Supplement: supp_gr.220202.117_Supplemental_Material.pdf [file supp_gr.220202.117_Supplemental_Material.pdf]

# Supplemental Material

Schwessinger et al.

Sasquatch: predicting the impact of regulatory SNPs on transcription factor binding from cell and tissue-specific DNase footprints

## Table of Contents

|                                                                                                                                                                  |    |
|------------------------------------------------------------------------------------------------------------------------------------------------------------------|----|
| <b>Supplemental Figures</b> .....                                                                                                                                | 4  |
| Supplemental Figure S1. DNase-seq strand imbalance in average, k-mer based profiles .                                                                            | 4  |
| Supplemental Figure S2. Impact of peak number and k-mer occurrence on average footprints.....                                                                    | 5  |
| Supplemental Figure S3. Impact of sequencing depth on average footprints.....                                                                                    | 6  |
| Supplemental Figure S4. Impact of DNase-seq source and protocols on average footprints.....                                                                      | 7  |
| Supplemental Figure S5. Analysing low input DNase-seq (liDNase-seq) data with Sasquatch.....                                                                     | 8  |
| Supplemental Figure S6. DNase-seq, ATAC-seq and TAL1 ChIP-seq of three individuals over the NPRL3 locus.....                                                     | 9  |
| Supplemental Figure S7. Comparison of Sasquatch for DNase-seq and ATAC-seq.....                                                                                  | 10 |
| Supplemental Figure S8. Common transcription factor associated k-mers across different tissues and data sources.....                                             | 11 |
| Supplemental Figure S9. Overlap of GATA1, TAL1 and DHS containing WGATAA matches in K562 cells.....                                                              | 12 |
| Supplemental Figure S10. Estimating specificity of damage scores on a TF basis.....                                                                              | 13 |
| Supplemental Figure S11. Simulating SFR changes associated with k-mer changes.....                                                                               | 14 |
| Supplemental Figure S12. Evidence for DNase I cut protection of TF associated <i>k</i> -mers within DHS.....                                                     | 15 |
| Supplemental Figure S13. Distribution of damage scores within DHS.....                                                                                           | 16 |
| Supplemental Figure S14. Comparison of different <i>k</i> -mer sizes for estimating the impact of sequence variants.....                                         | 17 |
| Supplemental Figure S15. Sasquatch analysis and footprint profiles of all SNPs found close to <i>r</i> _SNP and/or present in family members of the patient..... | 18 |
| Supplemental Figure S16. Benchmarking Sasquatch against deep learning approaches using bQTL SNPs in LD blocks.....                                               | 19 |
| <b>Supplemental Methods</b> .....                                                                                                                                | 20 |
| <b>Supplemental References</b> .....                                                                                                                             | 22 |
| <b>Supplemental Tables</b> .....                                                                                                                                 | 24 |
| Supplemental Table S1. Sasquatch analysis of SNPs associated with differential TAL1 binding.....                                                                 | 24 |

|                                                                                                                             |    |
|-----------------------------------------------------------------------------------------------------------------------------|----|
| Supplemental Table S2. List of 100, 1000 genomes version 3 imputed and DHS intersected SNPs with Sasquatch predictions..... | 25 |
|                                                                                                                             | -  |
|                                                                                                                             | 28 |
| Supplemental Table S3. Alignment and peak calling details.                                                                  | 29 |

## Supplemental Figures

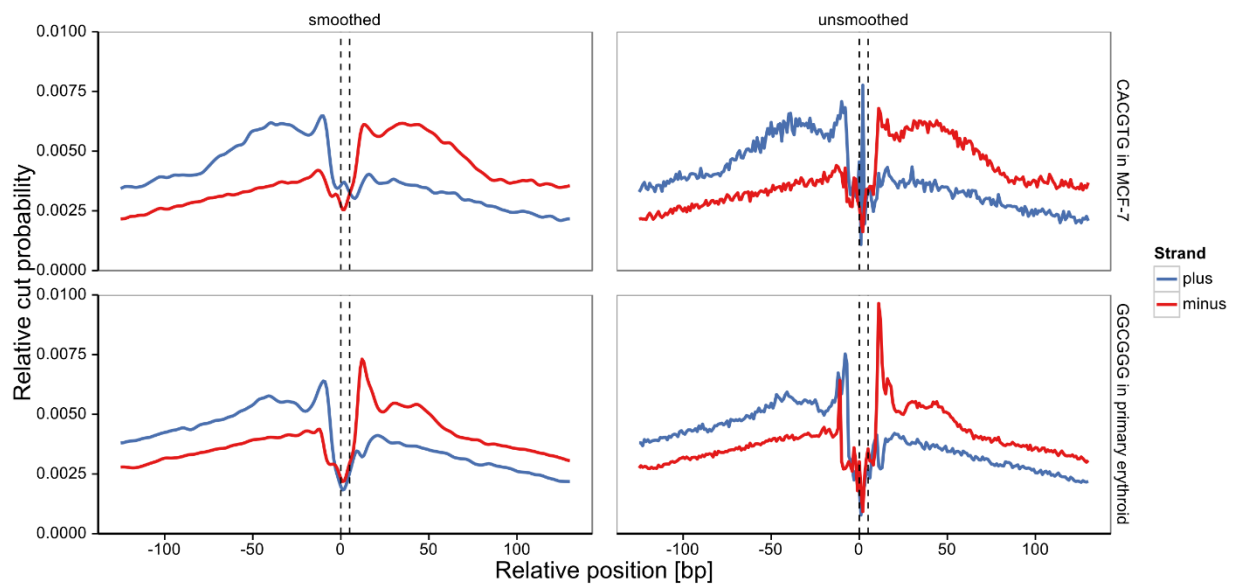

**Supplemental Figure S1. DNase-seq strand imbalance in average,  $k$ -mer based profiles.** It has been established that DNase I footprints exhibit a significant strand imbalance<sup>1</sup>. This effect can be observed in the average,  $k$ -mer based profiles as well, as shown for two  $k$ -mers associated with strong average footprints: CACGTG and GGCGGG.

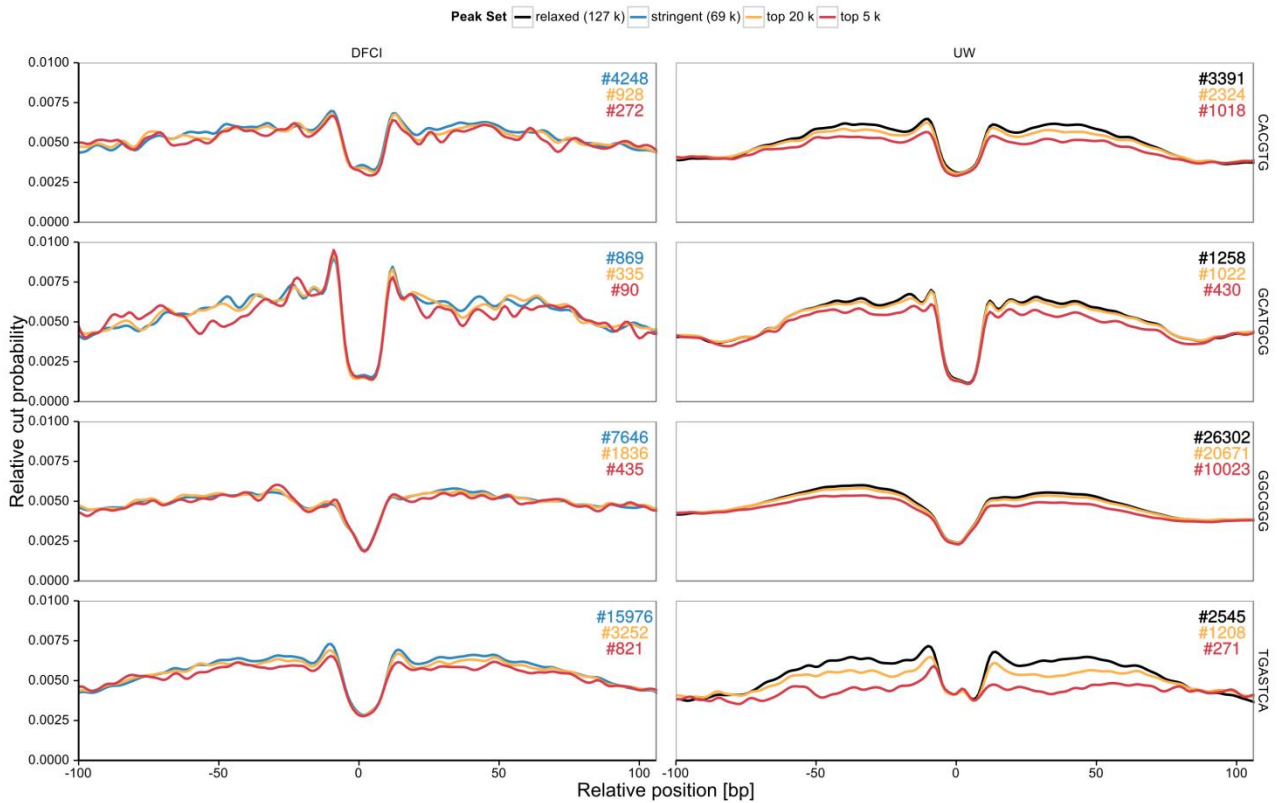

**Supplemental Figure S2. Impact of peak number and *k*-mer occurrence on average footprints.**

Shown are the smoothed relative DNase I cut probability profiles over four *k*-mers associated with housekeeping transcription factors: CACGTG = E-Box (e.g. MYC:MAX); GCATGCG = NRF1; GGCGGG = E2F and three zinc finger Krüppel-related factors (e.g. SP1, E2F4) and TGASTCA = NFE2. DNase-seq data were derived from two different publicly available sources and were processed using down-sampled, equal read depth alignments and different peak sets (relaxed, stringent and top 20 k and top 5 k peaks of the respective set). Consistent with the reduction of peak number the number of *k*-mers occurrences in peaks dropped. The average DNase I footprint shapes are consistent for a decreasing number of peaks and consequently *k*-mer occurrences.

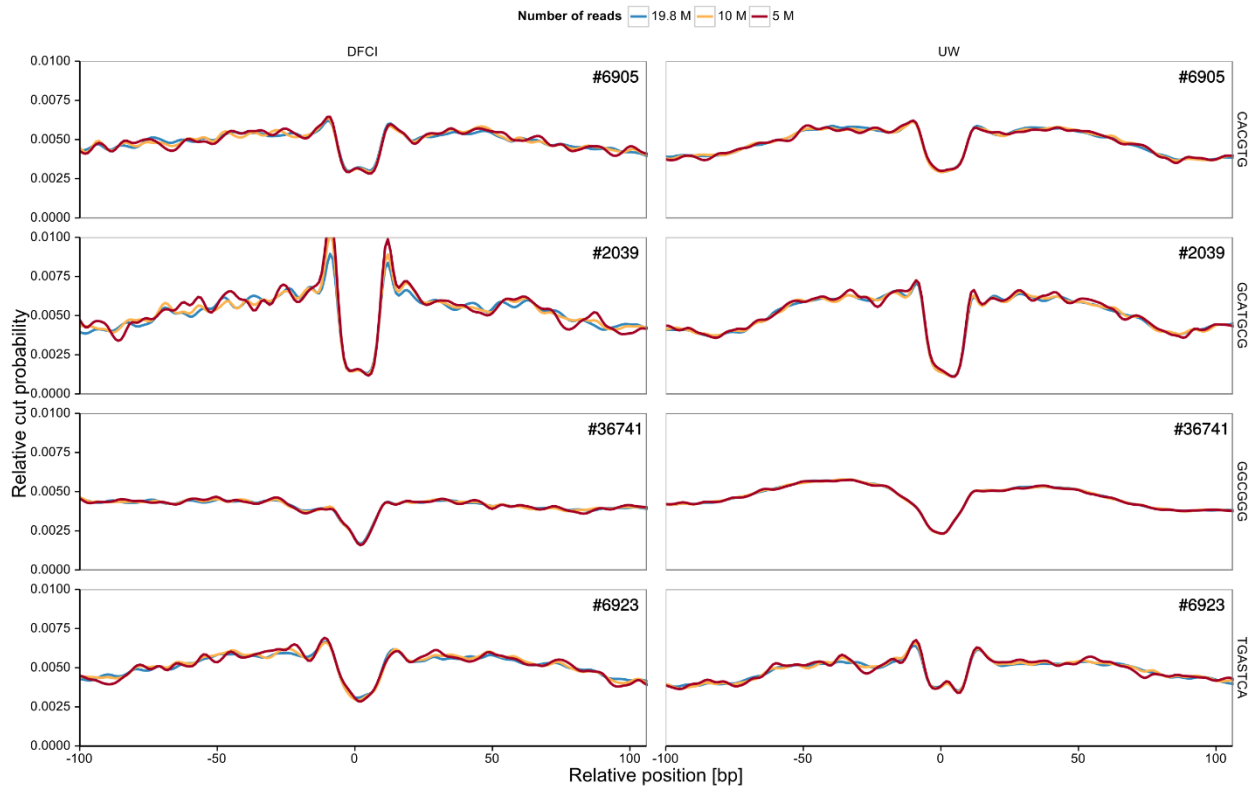

**Supplemental Figure S3. Impact of sequencing depth on average footprints.** Shown are the smoothed relative DNase I cut probability profiles over four  $k$ -mers associated with housekeeping transcription factors: CACGTG = E-Box; GCATGCG = NRF1; GGCGGG = E2F, SP1 and TGASTCA = NFE2. Data were derived from two different publicly available sources and were processed using down sampled alignments of 19.8 M (shared read depth), 10 M and 5 M reads and a union peak set.

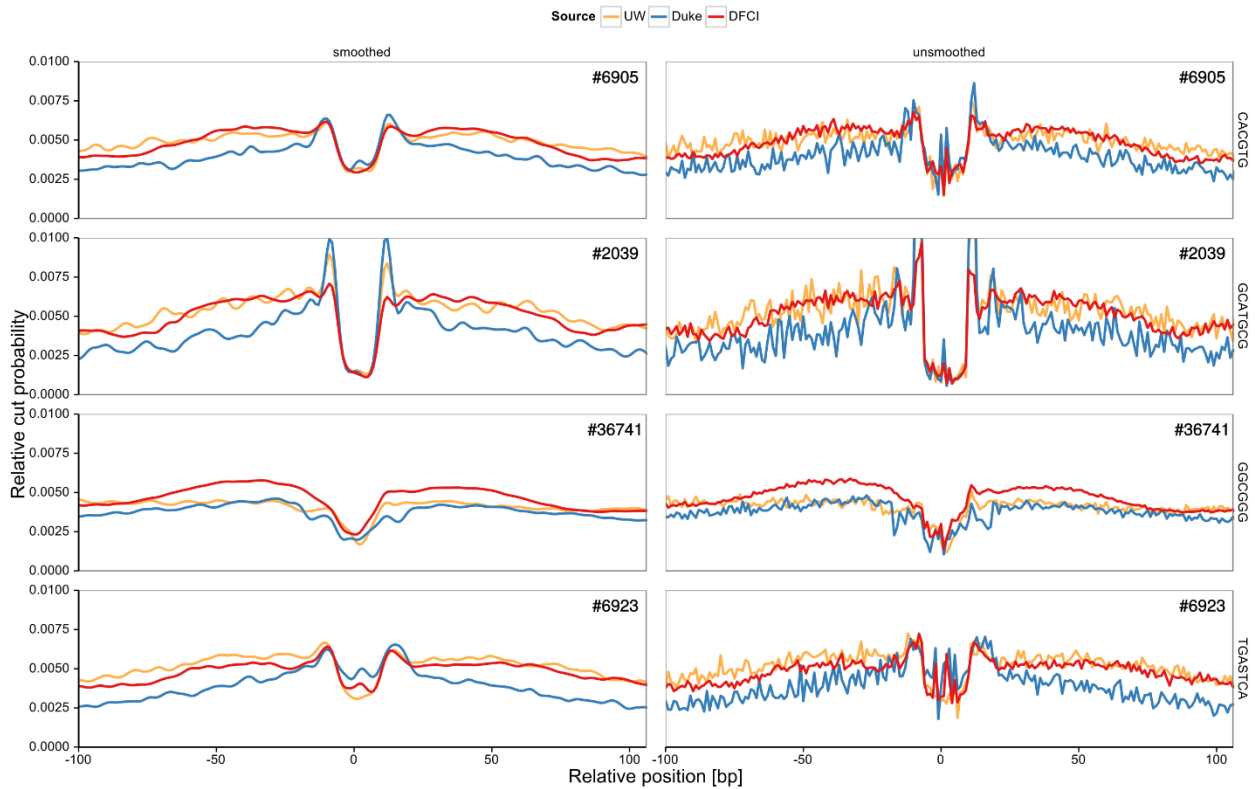

**Supplemental Figure S4. Impact of DNase-seq source and protocols on average footprints.** Shown are the smoothed and unsmoothed relative DNase I cut probability profiles over four *k*-mers associated with housekeeping transcription factors: CACGTG = E-Box; GCATGCG = NRF1; GGCGGG = E2F, SP1 and TGASTCA = NFE2. Data were derived from three different publicly available sources and were processed using down sampled, equal read depth and a union peak set. Occurrences of the respective *k*-mer were therefore equal and are indicated in black. The general average footprint shape is conserved while the height of the shoulder regions can differ depending on the data source and DNase-seq protocol used DNase-seq protocol.

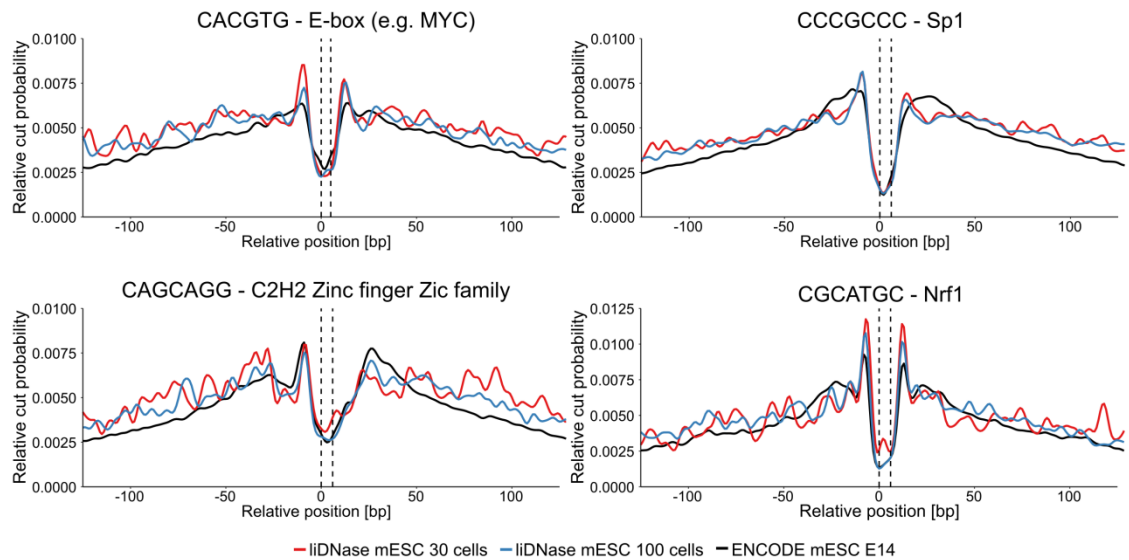

**Supplemental Figure S5. Analysing low input DNase-seq (liDNase-seq) data with Sasquatch.** Sasquatch is able to analyse low input DNase-seq proposed from Lu et al. 2016<sup>2</sup>. For comparison, example profiles of key transcription factors, derived from 30 and 100 cell liDNase-seq data and from the mouse ENCODE DNase-seq repository are shown. Data derived from liDNase-seq exhibit more footprint flanking noise but resolve the centric footprints comparable to the standard ENCODE data.



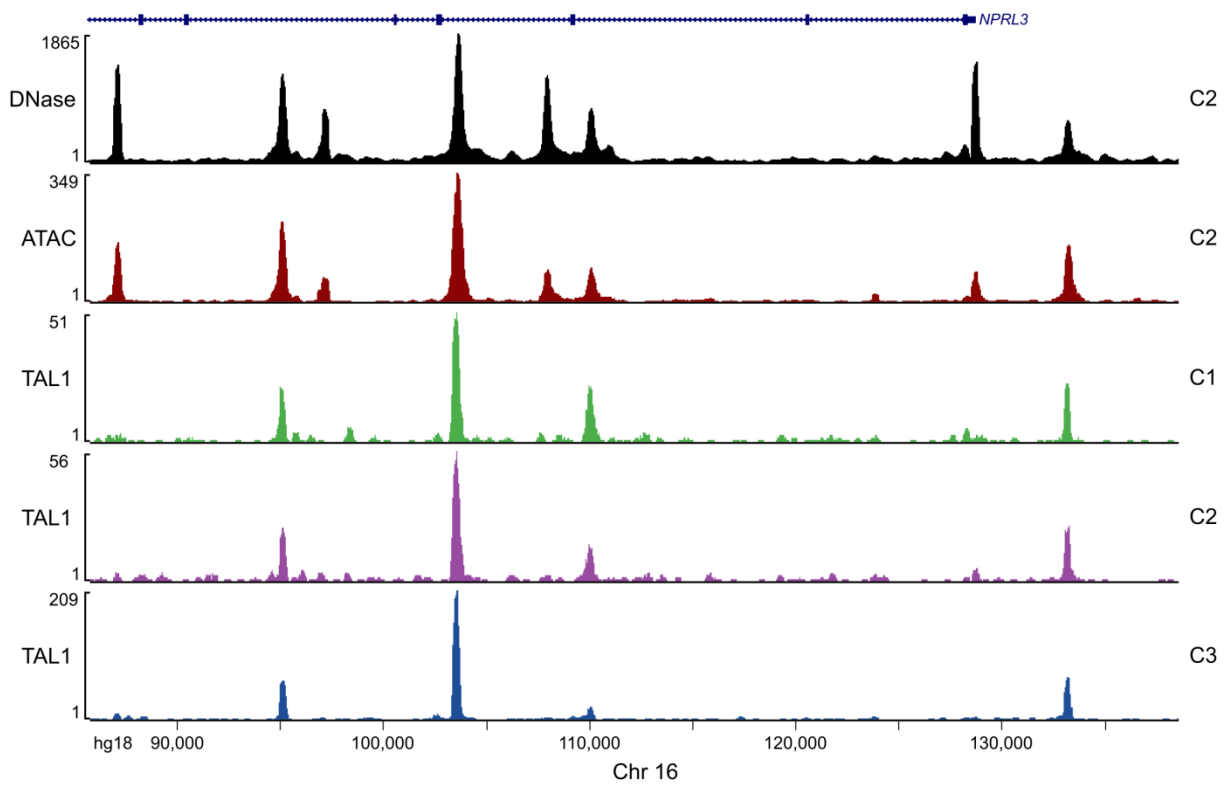

**Supplemental Figure S6. DNase-seq, ATAC-seq and TAL1 ChIP-seq of three individuals over the *NPRL3* locus.** DNase-seq and ATAC-seq of the same individual show similar sensitivity profiles. The TAL1 ChIP-seq shows distinct signal enrichment in previously characterised regulatory elements harbouring GATA-TAL1 binding sites.

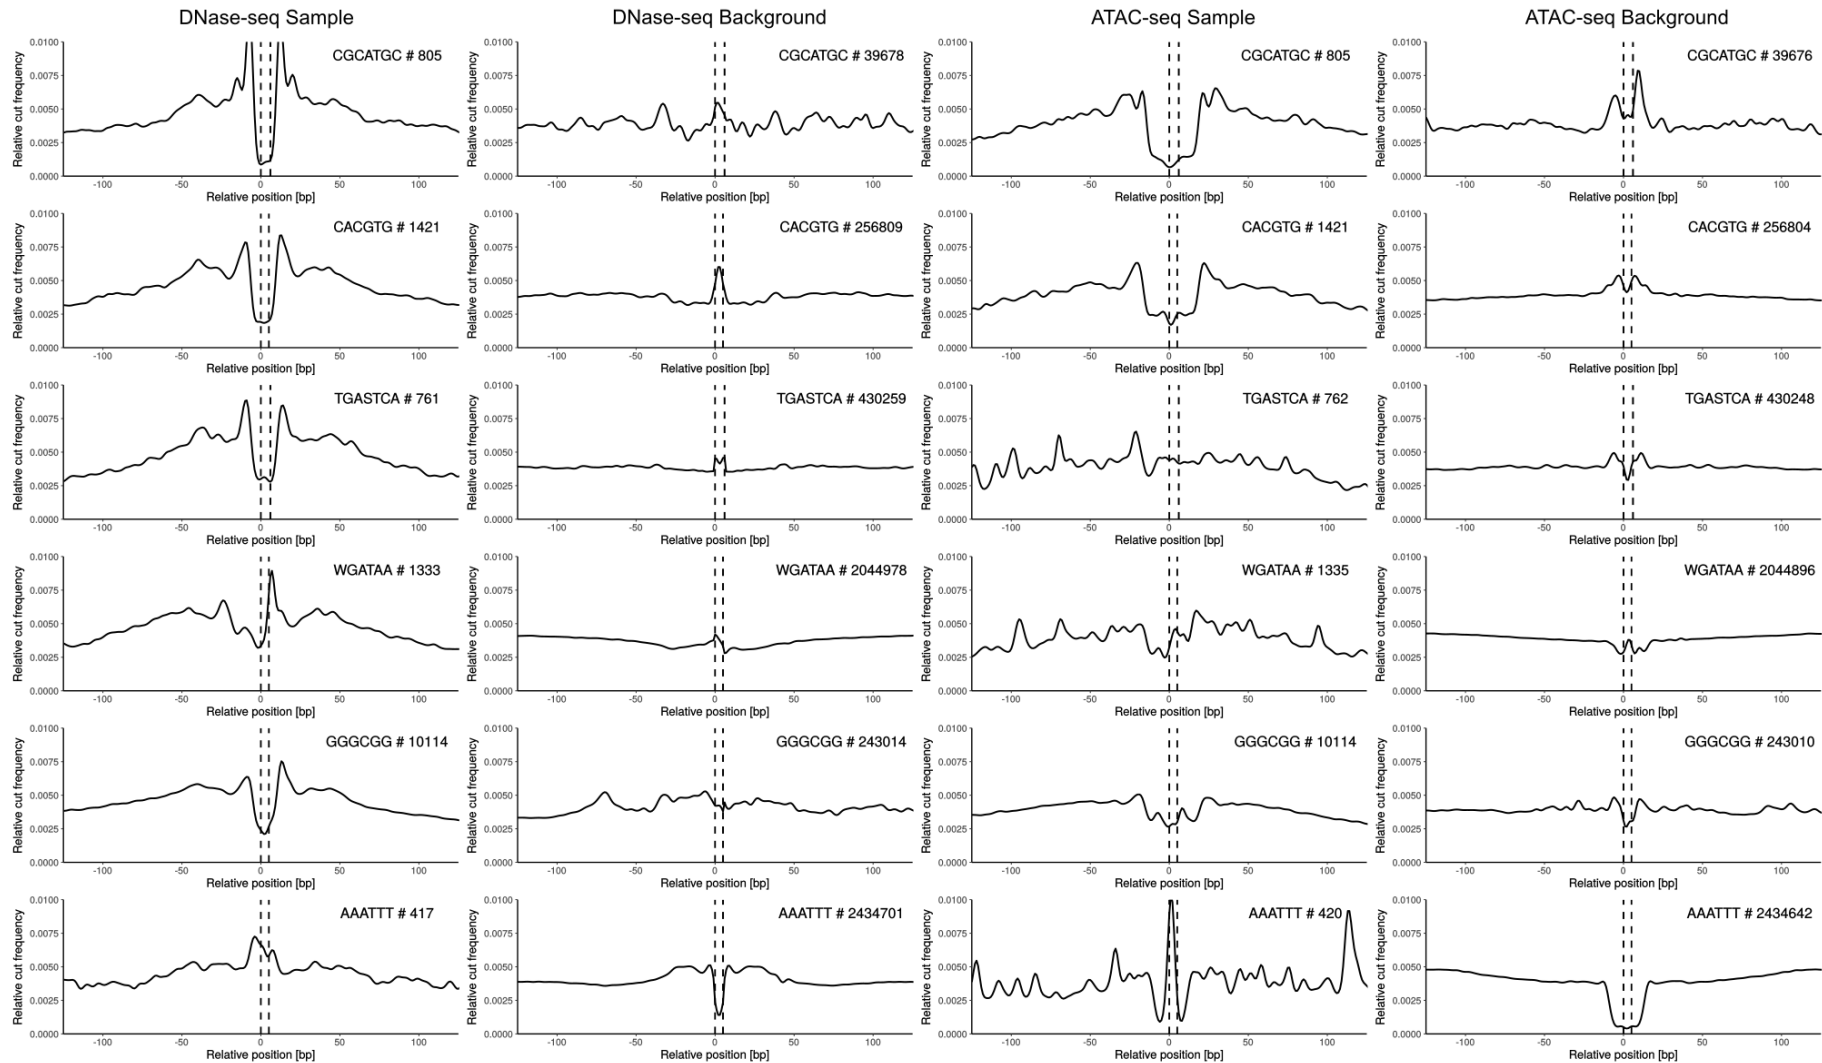

**Supplemental Figure S7. Comparison of Sasquatch for DNase-seq and ATAC-seq.** DNase-seq and ATAC-seq Sasquatch profiles from primary erythroid samples and de-proteinized DNA background digestions. Exemplary *k*-mers referring to TF known to be bound and one background repeat were selected. Respective occurrence of *k*-mers is indicated by #. ATAC-seq data resolve some but not all footprints, lack diversity in footprint shape and show stronger biases in the background.

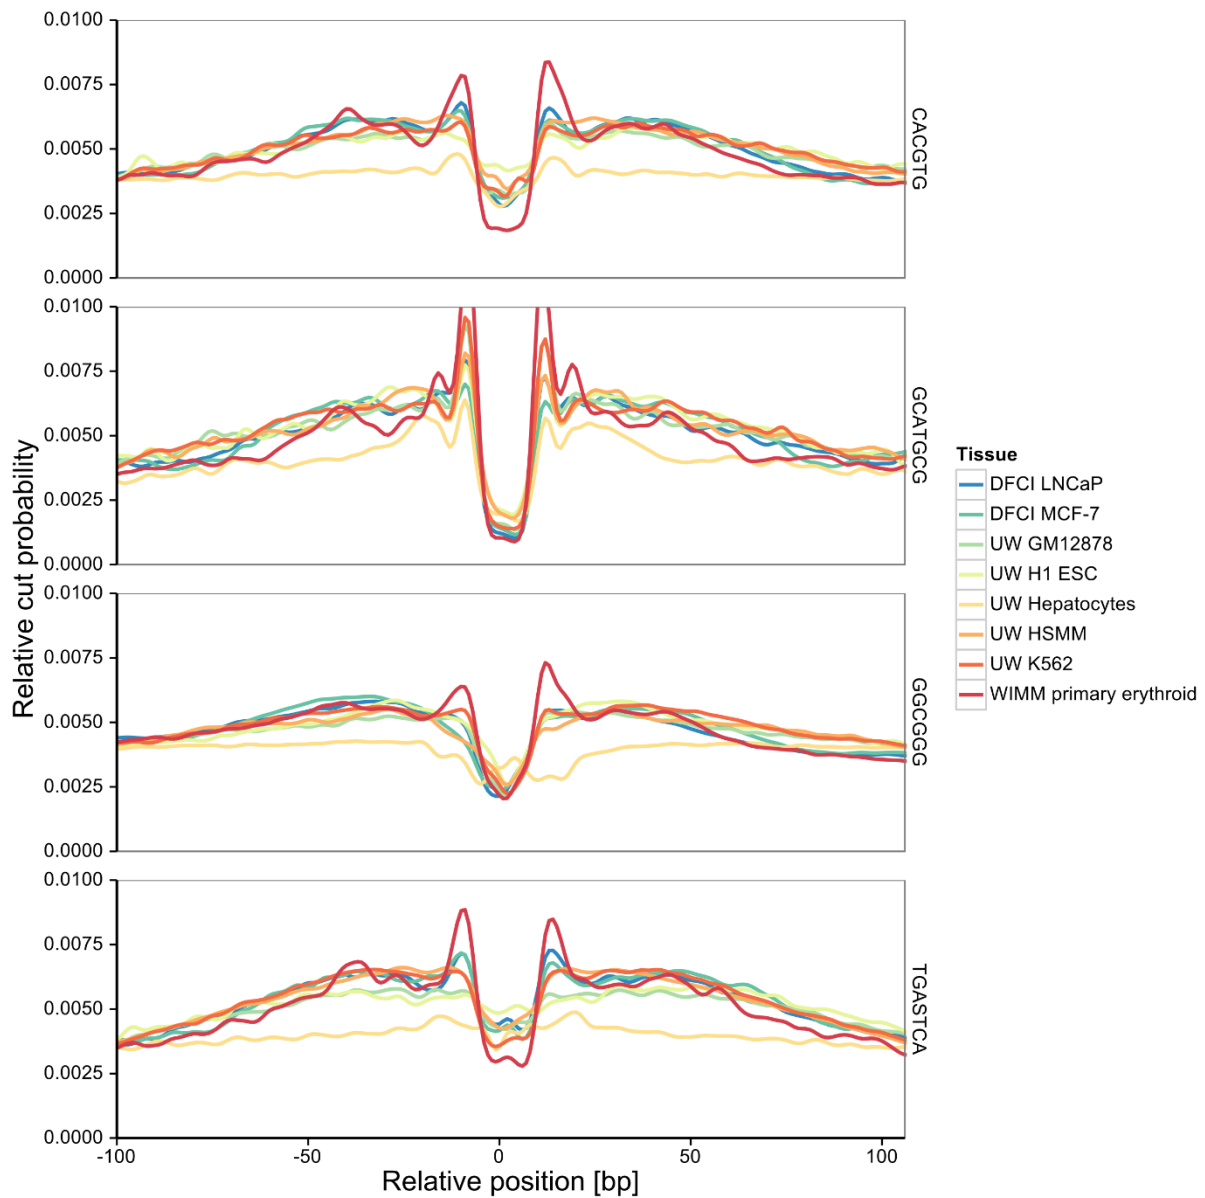

**Supplemental Figure S8. Common transcription factor associated *k*-mers across different tissues and data sources.** Shown are the smoothed relative DNase I cut probability profiles over four *k*-mers associated with housekeeping transcription factors: CACGTG = E-Box; GCATGCG = NRF1; GGCGG = E2F, SP1 and TGASTCA = NFE2. Data include publicly available and in-house data and cover different tissues. While the shoulder strength and shape may depend on the data source and protocol used, the general shapes of the footprints are consistent.

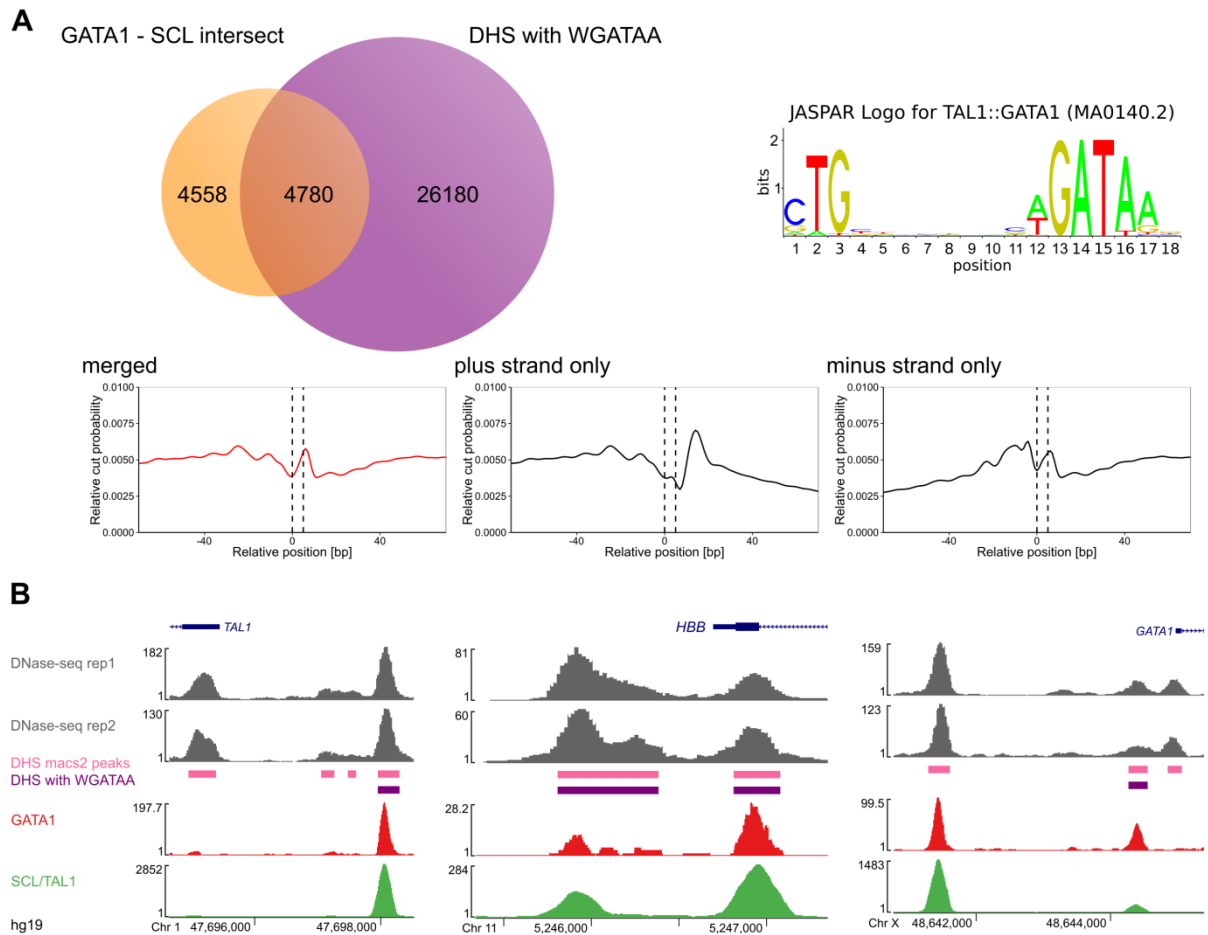

**Supplemental Figure S9. Overlap of GATA1, TAL1 and DHS containing WGATAA matches in K562 cells.** To demonstrate the co-occurrence of GATA1 and TAL1 in DHS, we retrieved aligned GATA1 and TAL1 ChIP-seq and DNase-seq data on the K562 cell line from ENCODE (SYDH TFBS: wgEncodeEH000638, wgEncodeEH001824 and UW DNase I HS: wgEncodeEH000484). Peaks were called using MACS2 with default settings and intersections were determined using BEDTools<sup>3</sup>. (A) We found 9338 GATA1 and TAL1 intersecting peaks of which more than half intersected with DHS that contained at least one WGATAA match. The JASPAR logo for TAL1 GATA1 co-binding is displayed on the right. This frequent co-binding is also reflected in the average footprint profiles over the *k*-mer WGATAA, where the average footprint is clearly extended upstream of the WGATAA match centre. Due to strand-imbalance, this pattern is primarily visible on the plus strand. (B) Examples of overlapping WGATAA containing DHS with GATA1 and TAL1 peaks.

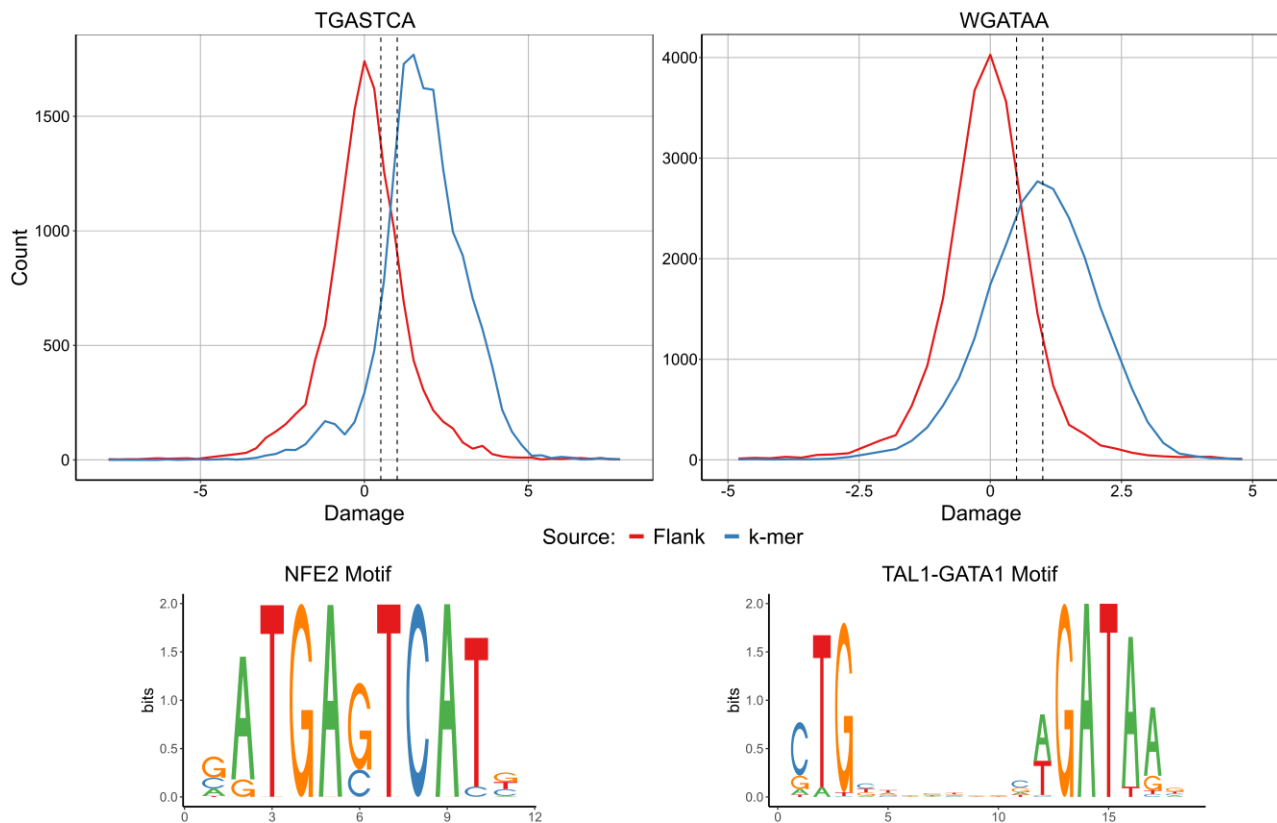

**Supplemental Figure S10. Estimating specificity of damage scores on a TF basis.** To estimate the specificity of the damage scores, we extracted the sequences around all matches to two  $k$ -mers within hypersensitive. Both  $k$ -mers are associated with TF binding in erythroid tissues (NFE2 and GATA1 respectively). We then simulated all possible mutations, assuming that changes within the  $k$ -mers itself are enriched for true binding changes, while mutations in the 3 bp directly flanking them would be enriched for negative controls that do not change binding. The information content of the respective JASPAR motifs supports this assumption (TAL1-GATA1 co-binding motif). The associated damage scores form distinct distributions, while the separation depends on the footprint strength of the underlying factor. Dashed lines indicate our empirically derived stringent and relaxed thresholds of 1.0 and 0.5.

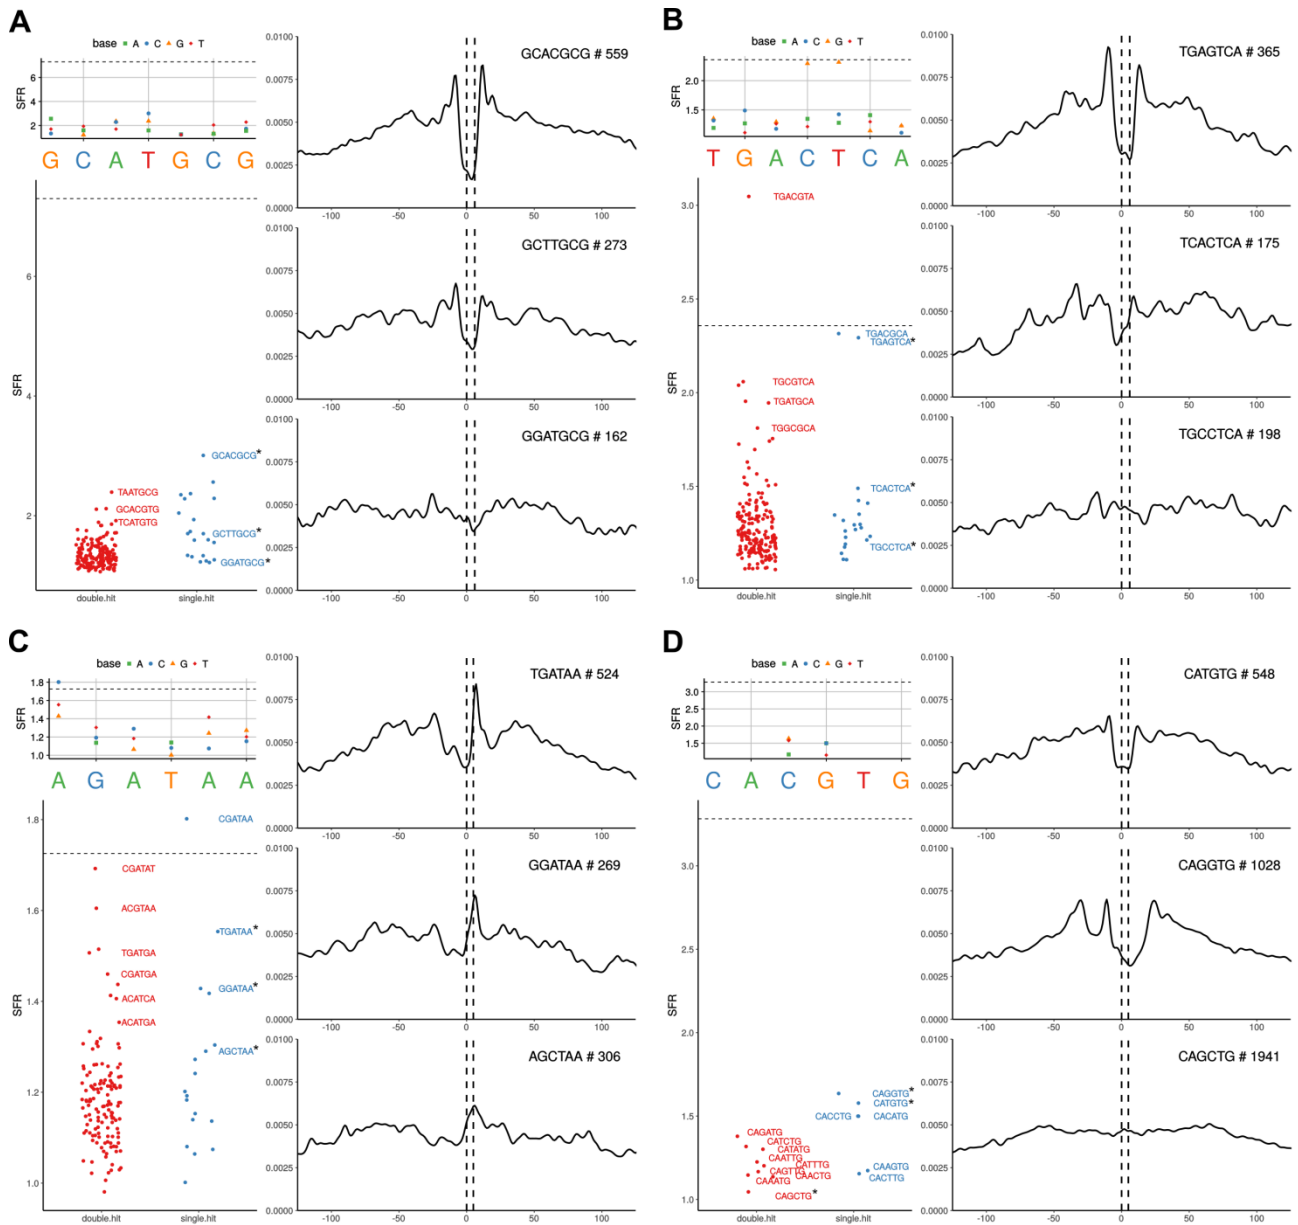

**Supplemental Figure S11. Simulating SFR changes associated with *k*-mer changes.** Four *k*-mers known to be associated with TF binding in erythroid tissues were mutated by single and double base pair changes and the corresponding SFRs and exemplary profiles visualised. Dashed lines indicate the SFR of the original *k*-mer queried. The SFRs for single changes were also plotted at their relative position to visualize base importance. A) NRF1 B) NFE2 C) GATA1 D) Only canonical E-boxes were probed to visualise changes in factor occupancy.

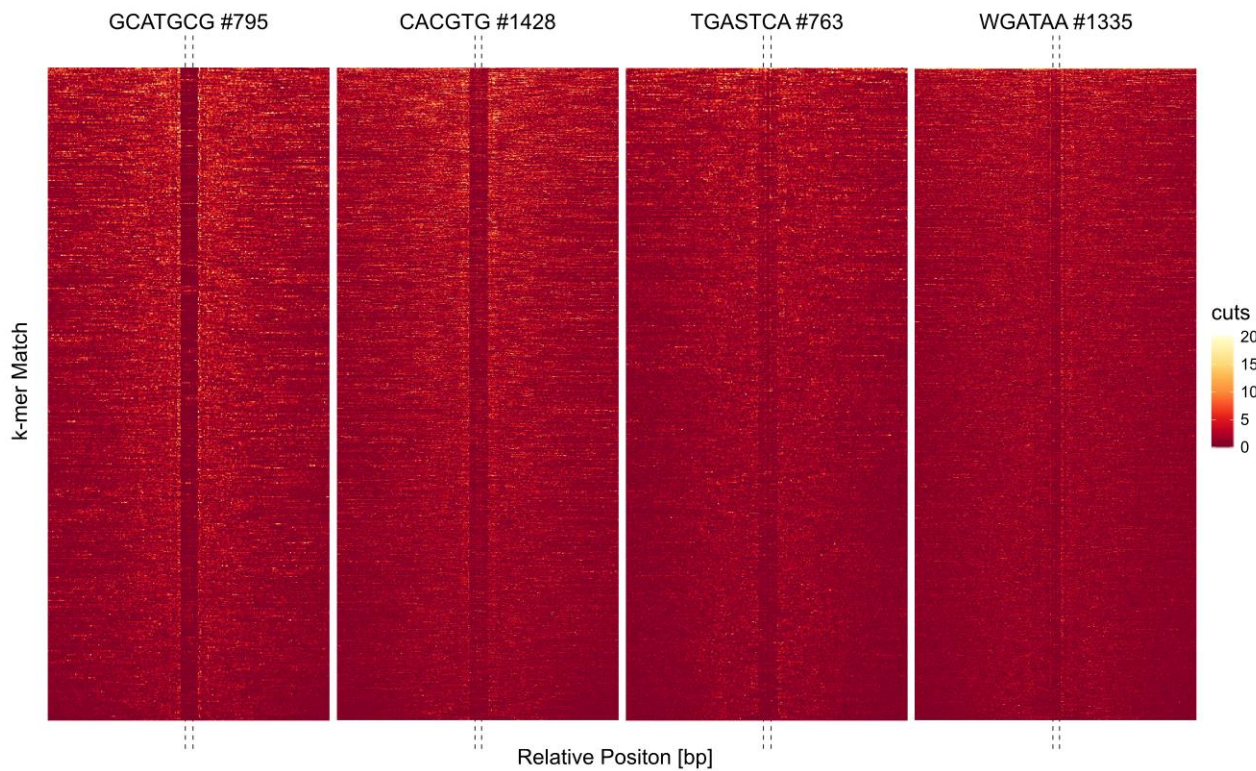

**Supplemental Figure S12. Evidence for DNase I cut protection of TF associated *k*-mers within DHS.** Shown are DNase I cut profiles over 250 bp surrounding all matches of *k*-mers within DHS. The *k*-mers are associated with TFs known to be active in erythroid tissues (from left to right: NRF1, E-box, NFE2, GATA1). The number of matches is marked by # and the matches were sorted for total cuts. Dashed lines indicate the actual *k*-mer positions. DNase I cuts were capped at 20 cuts for color scale purposes.

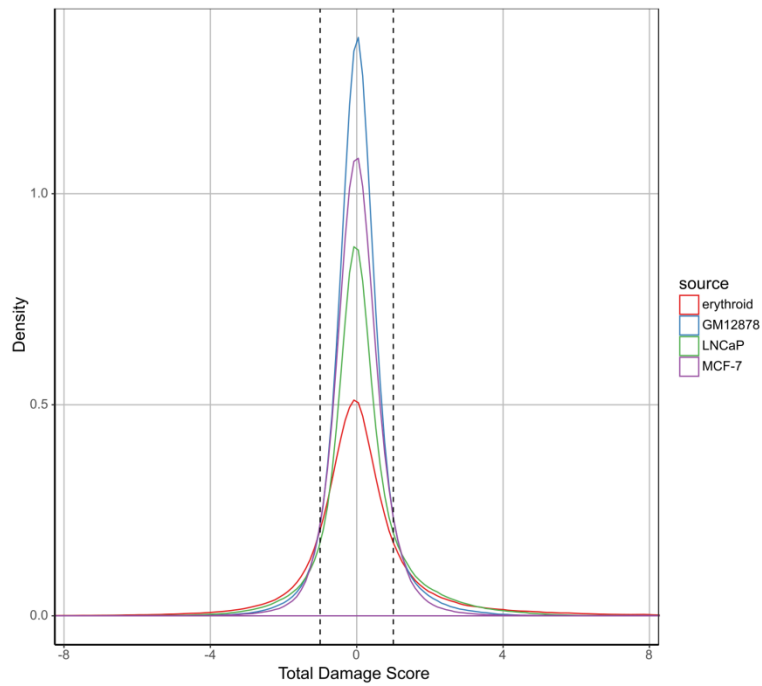

**Supplemental Figure S13 Distribution of damage scores within DHS.** Across three tissues, all DHS on Chr 16 were in silico mutated and the damage score of every possible substitution of every base was calculated. This is not a background distribution because it includes all positive, factor bound sequences within those sides as well as the negative sequences that are not bound within open-chromatin context. We found the majority of mutations to not alter TF binding, while the flanks of the distribution that indicate altered binding potential are larger depending on the DNase-seq data quality with respect to the resolution for identifying average footprints. Dashed lines indicate the -1.0 and 1.0 stringent damaging cut off we empirically derived.



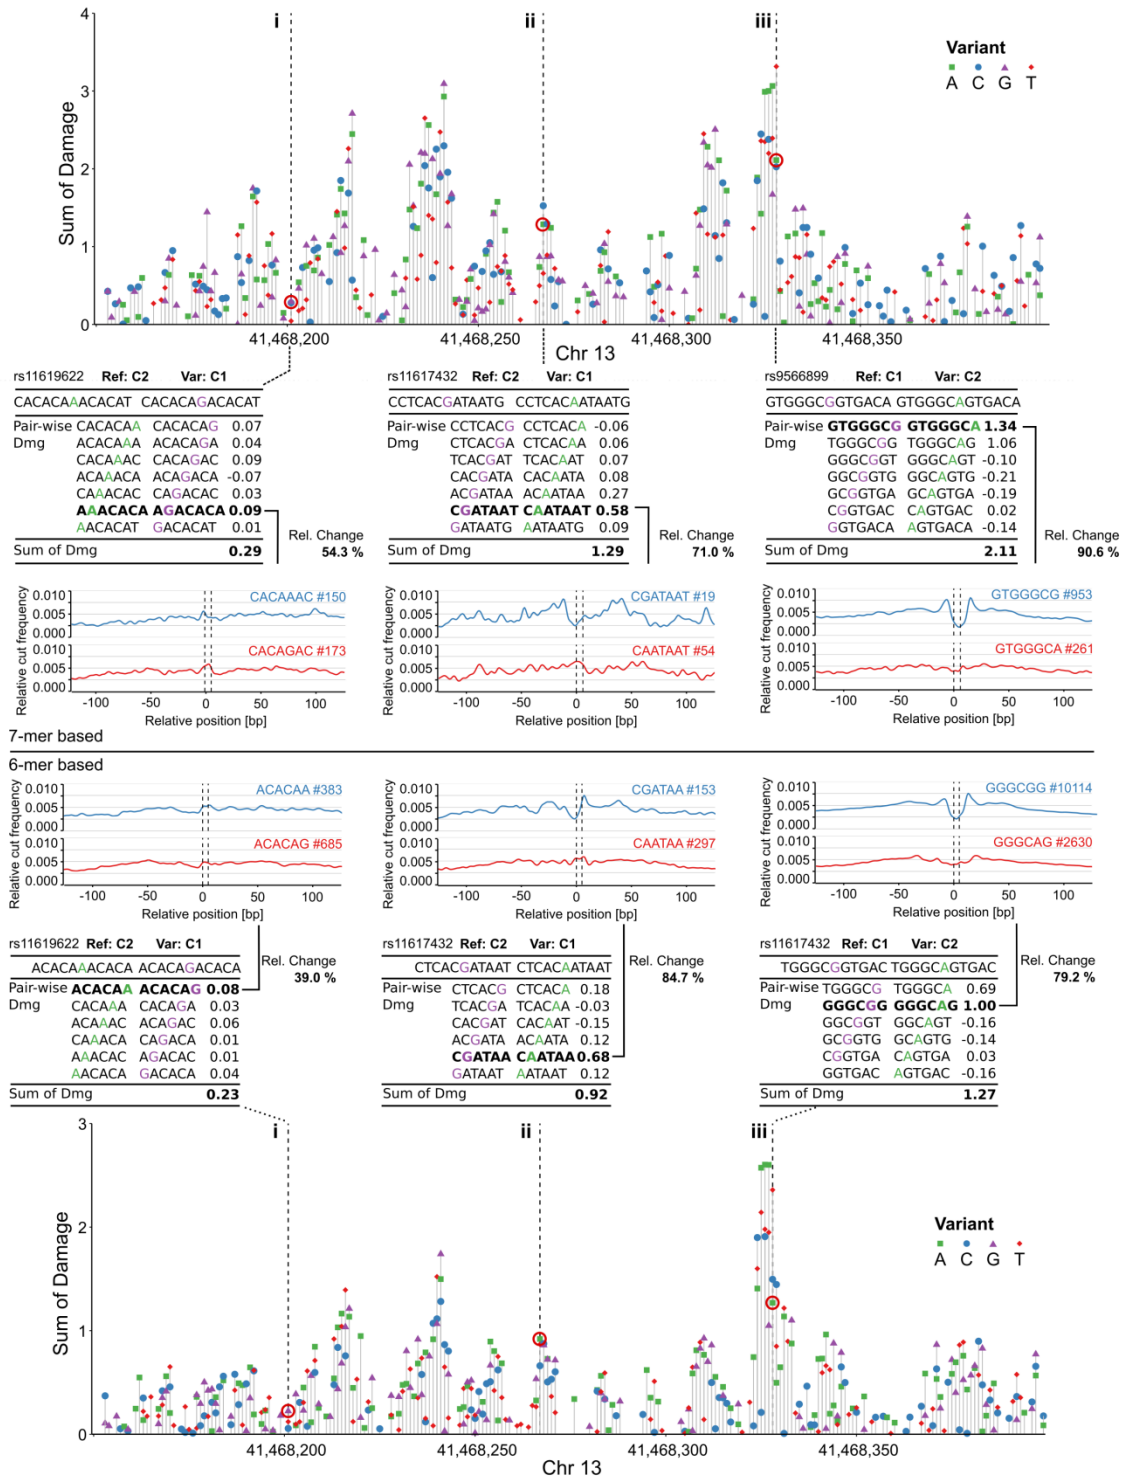

**Supplemental Figure S14. Comparison of different  $k$ -mer sizes for estimating the impact of sequence variants.** Detailed footprinting damage prediction including the respective genotype for individuals C1 and C2 at every SNP, detailed pair-wise damage table and comparison of 7-mer and 6-mer based analysis. By default we used a  $k$ -mer size of 7 bp to predict the impact of sequence variation. When detecting profiles derived from a very low number of  $k$ -mer occurrences, for example in variant **ii**, we fall back to query the variant on a 6-mer basis which are associated with higher occurrences. Overall, total damage scores on a 6-mer basis tend to be lower and thus offer a decreased discriminatory power, while general trends are conserved.

| chr   | pos    | id        | reference.seq  | alternative.seq | total.dmg | re.change |
|-------|--------|-----------|----------------|-----------------|-----------|-----------|
| chr16 | 149709 | .         | CATTATTAGAAAA  | CATTATCAGAAAA   | -1.411    | 0.706     |
| chr16 | 149764 | rs2685131 | CAGAAGGAGAAAAG | CAGAAGCAGAAAAG  | -0.954    | 0.924     |
| chr16 | 149816 | rs2685130 | TTCCAATGGCTTG  | TTCCAACGGCTTG   | 0.48      | 0.554     |
| chr16 | 149950 | rs2858926 | TGAGAGGTGCCCA  | TGAGAGATGCCCA   | -0.587    | 0.501     |
| chr16 | 149996 | .         | CCGGGACGGCTTG  | CCGGGATGGCTTG   | -0.122    | 0.331     |
| chr16 | 150000 | .         | GACGGCTTGTGGG  | GACGGCCTGTGGG   | 0.720     | 0.787     |
| chr16 | 150054 | .         | AGTTTTAGAGGT   | AGTTTTGAGAGGT   | 0.331     | 0.522     |
| chr16 | 150089 | .         | CAGTTTGAGAG    | CAGTTTGAGAG     | 0.041*    | 0.033*    |
| chr16 | 150161 | .         | CACAGGCTGTGAG  | CACAGTGTGTGAG   | -0.321    | 0.464     |
| chr16 | 150215 | .         | CCCGGGTCGGCTT  | CCCGGGACGGCTT   | -0.246    | 0.706     |
| chr16 | 150325 | .         | CCCGGGTCGGCTT  | CCCGGGACGGCTT   | -0.246    | 0.706     |

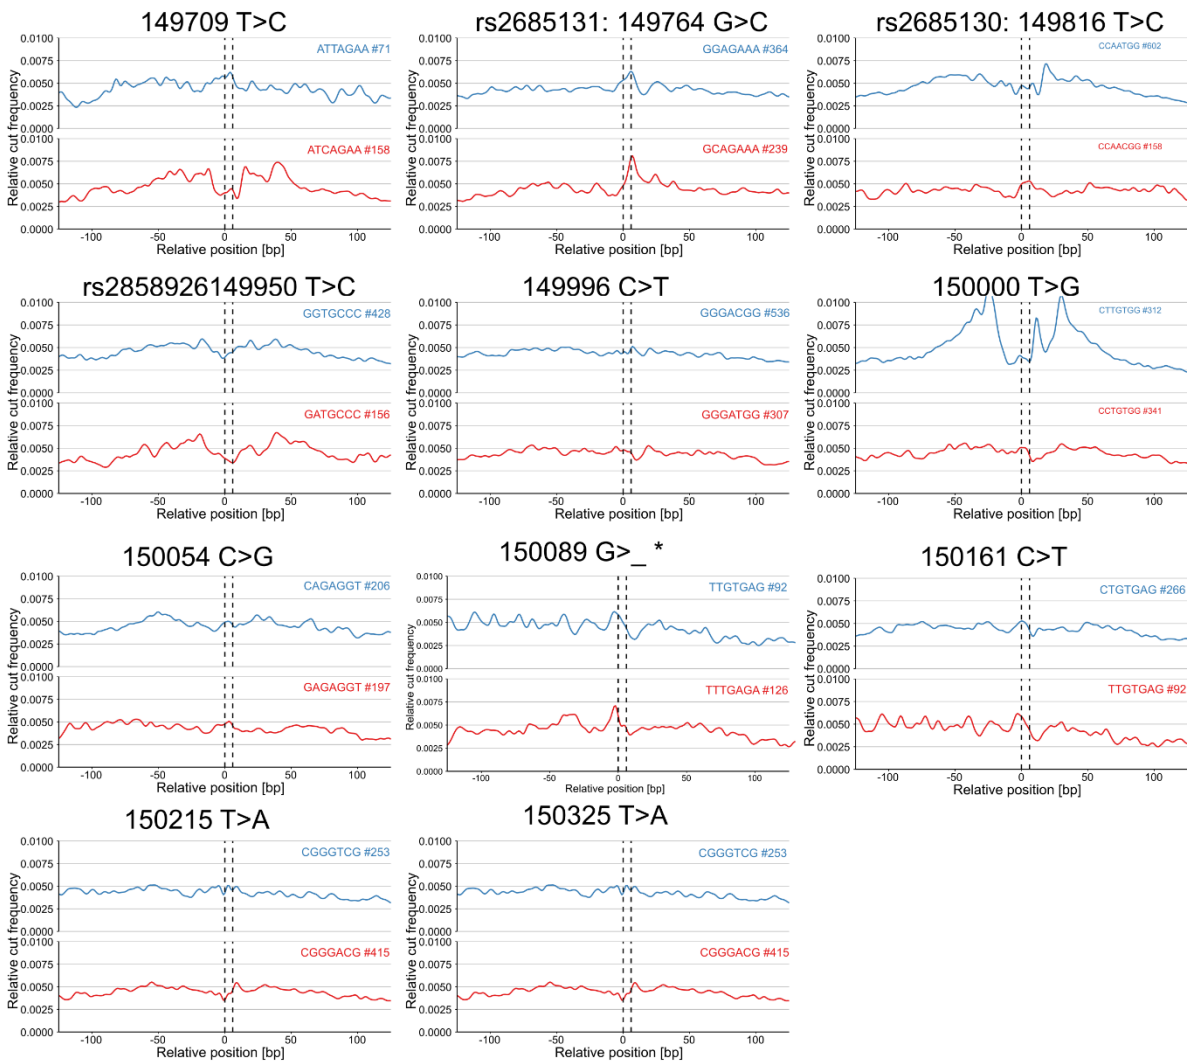

**Supplemental Figure S15. Sasquatch analysis and footprint profiles of all SNPs found close to r\_SNP and/or present in family members of the patient.** We found no other variant than the r\_SNP to have a striking damaging potential. \*For the single base-pair deletion we adapted Sasquatch to calculate a pseudo-damage score, by summing up all SFR values across the reference and variant sequence, normalizing them for a single  $k$ -mer window, calculating the difference and extrapolating that difference to a full 13 bp comparison window by multiplying it by 7.

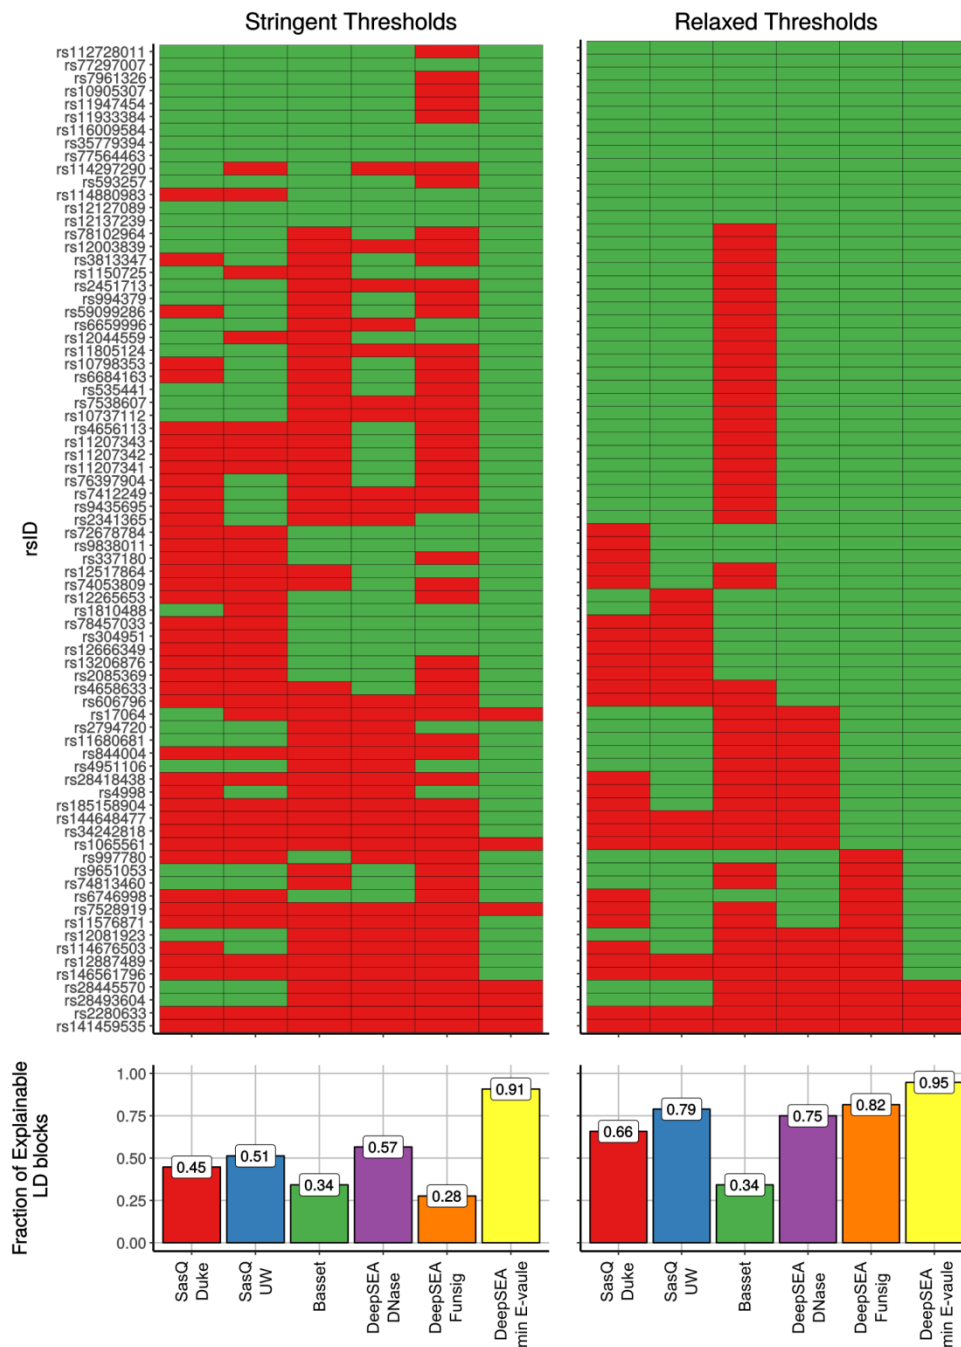

**Supplemental Figure S16. Benchmarking Sasquatch against deep learning approaches using bQTL SNPs in LD blocks.** Shown are the most significant bQTLs across five TFs identified in lymphoblastoid cell lines<sup>4</sup>. The bQTLs were imputed and grouped into high LD-blocks. For each SNP in the LD-block the potential impact was predicted based on GM12878 data using: 1) Sasquatch (two DNase-seq sources Duke and UW) 2) Basset and 3) DeepSEA where the DNase predictor, the functional significance score and the smallest e-value across all GM12878 predictors was used. Visualised is the fraction of explainable LD-blocks per tool. Stringent and relaxed thresholds were used respectively.

## **Supplemental Methods**

### **Cell source, culture, preparation and DNase-seq protocol**

Human primary erythroid stem cell progenitors were isolated from peripheral blood, using CD34 coupled magnetic beads. Cells were expanded for 7 days in low Epo (0.5 IU/ml) conditions and then transferred for differentiation in high Epo medium (3.0 IU/ml). On day 13, cells were washed in cold PBS, and counted. 50 million cells were used for the DNase-seq protocol.

DNase-seq protocol was performed as previously published<sup>5</sup>. DNA was purified using a phenol chloroform extraction and the optimal digests were selected for library preparation using NEB Library Preparation kit. Libraries were amplified and bar-coded using the NEB Next 2xMastermix (NEB) and TruSeq oligos. A size selection step for small fragments was performed. DNase-seq library profiles were visualized using D1000 tape on the Tapestation (Agilent) and quantified using the universal library quantification kit (KAPA Biosystems). Samples were sequenced on Illumina platform using: 150 bp paired end reads (MiSeq), 75bp paired end reads (HiSeq) or 40/75 bp (NextSeq) paired end reads. For the background libraries, 100 ng of genomic DNA was incubated with DNase I for 3 minutes and then libraries were created to test sequence for sequence bias.

### **ATAC-seq protocol**

ATAC-seq was performed as previously published<sup>6</sup>. Nuclei of 70000 lysed cells were isolated and transposition with Tn5 transposase (Nextera, Illumina) was performed for 30 minutes at 37 °C. The DNA was extracted using a MinElute kit (Qiagen). Libraries were then amplified and barcoded using the NEBNext 2xMastermix (NEB) and the custom ATAC-seq primers published by Buenrostro and colleagues. ATAC-seq libraries profiles were visualized using D1000 tape on the Tapestation (Agilent) and quantified using the universal library quantification kit (KAPA Biosystems). For the ATAC-seq background 100 ng of genomic DNA was incubated with the Tn5 transposase and the library was following the protocol described above.

### **Estimating intrinsic DNase I sequence bias**

To correct for DNase I sequence bias, 6-mer based weighting factors were calculated according to the DNase I sequence preferences. For estimating these propensities, deproteinized genomic DNA was digested with DNase I and sequenced according to the protocol described above. Sequencing was performed at high depth (119 million mapable reads for the human and 133 million for the mouse background). DNase I cuts were mapped and average cut profiles of all possible 6-mers within the mapable genome were recorded as described above. The relative sequence cut probability of each 6-mer was then calculated as the recorded number of cuts at the 4th base position of each 6-mer divided by the number of recorded 6-mer occurrences along the entire mapable genome. The relative cut probabilities were shifted to achieve a median cut probability of 1 and relative weights were calculated to correct the relative sequence cut probability of every 6-mer to 1. A sequence context of 6 was chosen because it has been shown to capture the DNase I sequence bias sufficiently. An ATAC-seq background was estimated using the same procedure.

### **Retrieving and processing public available data**

We retrieved DNase-seq data from three different publicly available sources (DFCI = Dana-Farber Cancer Institute<sup>7</sup>, GSE51915; Duke = ENCODE, DNase I HS, Duke University, UW = ENCODE, DNase I HS, University of Washington). ENCODE<sup>8</sup> data were downloaded as aligned reads and called peaks were retrieved from the repository. DFCI data were retrieved as raw data and mapping and peak calling was performed using our in-house pipeline as described above, with the additional

step of flashing (FLASH v1.2.8<sup>9</sup>) and remapping unmapped reads. Peak calls for ENCODE data were downloaded. For DFCI data a manually curated SeqMonk workflow like peaks were called. Although ENCODE peak calls and peak calls derived from our in-house pipeline or MACS2<sup>10</sup> differ strikingly in terms of stringency, the results are comparable because Sasquatch is robust towards peak call stringency (Supplemental Fig. S2-6). When available, replicates were processed separately and their cut profiles were merged afterwards by averaging the *k*-mer occurrences and DNase I cut profiles.

### **Processing liDNase-seq data**

Mouse ESC, liDNase-seq raw data from 30 and 100 cells input (GSM2029801, GSM2029802) were downloaded and processed using our in-house DHS pipeline as described above. Peaks were called using MACS2 with default settings and *k*-mer based cut profiles were calculated as described above. Complementary, mENCODE mESC E14 (wgEncodeEM003417, GSM1014154) data were retrieved and merged as described for the human ENCODE data. Overlay profiles of TF core sequences across the three data types were plotted using Sasquatch's core functions.

### **Comparison against JASPAR motifs**

Comparison against JASPAR motif database was performed utilizing the R packages Biostrings<sup>11</sup> and TFBSTools<sup>12</sup> (v1.6.1). Position weight matrices (PWM) data were retrieved from the JASPAR 2016<sup>13</sup> (v1.0.0) R package distribution (using all PWM versions). Each *k*-mer was padded with "N"s and scanned against the PWM data using the searchSeq function, reporting up to six highest matching factors with relative scores  $\geq 0.8$ .

### **Estimating evidence of *k*-mer protection from DNase I cutting**

Sequence matches to the *k*-mers (WGATAA, TGASTCA, GCATCGC, CACGTG) within hypersensitive sites were extracted and the surrounding DNase I cuts were recorded. These cut profiles per match were sorted for total number of cuts within the window and plotted while capping the maximum reads per base to 20 for colour scaling.

### **SFR distribution over *k*-mer changes**

To assess the changes in SFR associated with single and double base pair changes, the SFR of exemplary factor bound *k*-mers (AGATAA, GCATGCG, TGA CTCA) and of every possible single or double base pair changed *k*-mer was calculated. To visualise multiple factors of related *k*-mers, the SFR of a common E-box motif *k*-mer (CACGTG) and of every possible canonical E-box *k*-mer following CANNTG) was calculated.

### **Estimating the distribution of damage scores within hypersensitive sites**

For estimating the general distribution of damaging scores within hypersensitive sites, the respective DHS peak calls of four tissues on Chromosome 16 were used and every possible mutation of every base within those was simulated and the damaging score calculated. Note that this is not a pure negative background as it contains negative SNPs in the DHS background as well as all SNPs within true binding sites.

### **Estimating the damage score distribution and specificity on a factor basis**

In the context of binding site rich open-chromatin regions sampling a true negative background to set the boundaries of what can be classed as strong losses or gains in footprints, is difficult. Therefore, we devised a strategy to approximate true negative and true positive variants using the very well characterised motifs two TFs (NFE2 and GATA1. We extracted the surrounding

sequences for all  $k$ -mer matches in open-chromatin sites in erythroid cells. As it has been shown that the ability of these motifs to mediate binding is dependent on the centre 6 and 7 bases respectively, we can assume that SNPs lying directly within the  $k$ -mer would be enriched for binding altering variants, while SNPs directly flanking those  $k$ -mers would be more likely to be neutral. The sequences surrounding all  $k$ -mer matches (WGATAA, TGASTCA) were extracted. To approximate a set of SNPs affecting and a set of non-affecting transcription factor binding, every possible mutation within the  $k$ -mer and within the 3 bps flanking the  $k$ -mer up and downstream respectively was simulated and the damaging score (Supplemental Fig. S10).

### **Estimate impact of DNase-seq protocol, sequencing depth, peak calling and $k$ -mer occurrence**

To compare the influence of different DNase-seq protocol, MCF-7 DNase-seq data from three different sources (DFCI: GSM1255280; Duke: GSM816627; and ENCODE: GSM1024767), each with its respective DNase-seq protocol details were retrieved and pre-processed as described above. Alignments were down sampled using SAMtools<sup>14</sup> to match the dataset with the lowest read number (~19.8 M reads). Merged union peaks were derived from all three peak calls using BEDTools *merge* (*-d 10*). DNase I cut profiles per dataset were then processed with Sasquatch using the union peaks and down sampled alignments. To assess the impact of sequencing depth, data were processed using the respective peak calls, the down sampled alignments and further down sampled alignment versions with 10 M and 5 M reads respectively. To assess the impact of peak calling stringency and  $k$ -mer occurrences, each down sampled alignment was processed with each dataset's respective initial peak call (in-house pipeline output for DFCI or uniquely processed ENCODE peaks for Duke and UW). In addition, cut profiles were calculated using only the top 20,000 or 5,000 peaks, after sorting for signal strength or p-value respectively.

### **Supplemental References**

1. Piper, J. *et al.* Wellington: a novel method for the accurate identification of digital genomic footprints from DNase-seq data. *Nucleic Acids Res.* **41**, e201 (2013).
2. Lu, F. *et al.* Establishing Chromatin Regulatory Landscape during Mouse Preimplantation Development. *Cell* **165**, 1375–1388 (2016).
3. Quinlan, A. R. & Hall, I. M. BEDTools: a flexible suite of utilities for comparing genomic features. *Bioinformatics* **26**, 841–842 (2010).
4. Tehranchi, A. K. *et al.* Pooled ChIP-Seq Links Variation in Transcription Factor Binding to Complex Disease Risk. *Cell* **165**, 730–741 (2016).
5. Hosseini, M. *et al.* Causes and consequences of chromatin variation between inbred mice. *PLoS Genet.* **9**, e1003570 (2013).
6. Buenrostro, J. D., Giresi, P. G., Zaba, L. C., Chang, H. Y. & Greenleaf, W. J. Transposition of native chromatin for fast and sensitive epigenomic profiling of open chromatin, DNA-binding proteins and nucleosome position. *Nat. Methods* **10**, 1213–8 (2013).
7. He, H. H. *et al.* Refined DNase-seq protocol and data analysis reveals intrinsic bias in transcription factor footprint identification. *Nat. Methods* **11**, 73–8 (2014).
8. The ENCODE Project Consortium. The ENCODE (ENCyclopedia Of DNA Elements) Project. *Science* **306**, 636–640 (2004).
9. Magoč, T. & Salzberg, S. L. FLASH: Fast length adjustment of short reads to improve genome assemblies. *Bioinformatics* **27**, 2957–2963 (2011).

10. Zhang, Y. *et al.* Model-based analysis of ChIP-Seq (MACS). *Genome Biol.* **9**, R137 (2008).
11. H, P., Aboyou P, G. R. & S, D. Biostrings: String objects representing biological sequences, and matching algorithms. R and DebRoy S (2017). Biostrings: String objects (2017).
12. Tan, G. & Lenhard, B. Sequence analysis TFBSTools : an R / Bioconductor package for transcription factor binding site analysis. *Bioinformatics* **32**, 4–5 (2016).
13. Mathelier, A. *et al.* JASPAR 2016: a major expansion and update of the open-access database of transcription factor binding profiles. *Nucleic Acids Res.* **44**, gkv1176 (2015).
14. Li, H. *et al.* The Sequence Alignment/Map format and SAMtools. *Bioinformatics* **25**, 2078–2079 (2009).
15. van der Harst, P. *et al.* Seventy-five genetic loci influencing the human red blood cell. *Nature* **492**, 369–75 (2012).

## Supplemental Tables

**Supplemental Table S1 Sasquatch analysis of SNPs associated with differential TAL1 binding.**

| ID          | Chr   | Pos hg18  | Sequence         | kmer Ref | kmer Var | SFR Ref | SFR Var | Total Damage | Rel. Change | JASPAR                              |
|-------------|-------|-----------|------------------|----------|----------|---------|---------|--------------|-------------|-------------------------------------|
| rs73185392  | chr13 | 41494435  | AGCCCCG/AATAATA  | AGCCCCG  | AGCCCCA  | 2.297   | 1.097   | 3.07         | 0.925       | GATA2=0.98; GATA5=0.95; GATA3=0.94; |
| rs1356334   | chr2  | 236034216 | CTGGTGG/AGAAATTA | CTGGTGG  | CTGGTGA  | 2.718   | 1.239   | 2.786        | 0.861       | HIC2=0.93; E2F6=0.92; TEAD3=0.9;    |
| rs9566899   | chr13 | 41468327  | GTGGGCG/AGTGACA  | GTGGGCG  | GTGGGCA  | 2.736   | 1.164   | 2.112        | 0.906       | SP1=0.93; SP1=0.91; ZNF354C=0.9;    |
| rs11617432  | chr13 | 41468266  | CCTCACG/AATAATG  | CGATAAT  | CAATAAT  | 1.916   | 1.265   | 1.287        | 0.71        | GATA2=0.98; GATA3=0.94; GATA5=0.94; |
| rs28508084  | chr15 | 96337645  | AACTAA/GTCAGGC   | AACTAAA  | AACTAAG  | 1.452   | 1.213   | 0.923        | 0.392       | GATA3=0.9; EN1=0.89; GATA2=0.89;    |
| rs198415    | chr1  | 11824178  | TGGTAT/CTAGTCCC  | GTATTAG  | GTATCAG  | 1.601   | 1.249   | 0.853        | 0.306       | GSC2=0.93; OTX1=0.92; TEAD3=0.92;   |
| rs9532971   | chr13 | 41493929  | GCCTCAT/CAGAGGT  | ATAGAGG  | ACAGAGG  | 1.463   | 1.08    | 0.754        | 0.574       | EMX2=0.88; LHX9=0.88; NOTO=0.87;    |
| rs1469713   | chr19 | 19389805  | GCAGACA/GTCTGGG  | GACATCT  | GACGTCT  | 1.746   | 1.301   | 0.754        | 0.596       | GATA2=0.96; MEIS1=0.94; TCF4=0.94;  |
| rs11619622  | chr13 | 41468200  | CACACA/GACACAT   | AAACACA  | AGACACA  | 1.196   | 1.089   | 0.292        | 0.191       | FOXL1=0.96; FOXP3=0.96; FOXD2=0.96; |
| rs112342010 | chr2  | 119649696 | ACAGCCG/AGCTGGC  | AGCCGGC  | AGCCAGC  | 1.183   | 1.069   | 0.192        | 0.292       | TFAP2A=0.91; MEIS1=0.86; TCF3=0.84; |
| rs9929936   | chr16 | 73494733  | GCCAAC/ATTCTCT   | AACTTTC  | AACATTC  | 1.367   | 1.101   | 0.039        | 0.314       | SPI1=0.93; SOX10=0.93; FOXD2=0.89;  |
| rs2180414   | chr6  | 157802774 | GTGATA/CCCTCTC   | TGATAAC  | TGATACC  | 1.341   | 1.123   | -0.296       | 0.08        | GATA5=0.96; GATA2=0.96; GATA3=0.96; |
| rs12205172  | chr6  | 6425000   | CGGCTA/AAGTTAT   | CGGCTAC  | CGGCTAA  | 1.187   | 1.434   | -0.382       | 0.376       | BSX=0.92; RHOXF1=0.91; BARX1=0.91;  |
| rs1469712   | chr19 | 19389820  | ACTCAGC/ATAAAGG  | CAGCTAA  | CAGATAA  | 1.181   | 1.78    | -1.294       | 0.768       | RHOXF1=0.94; NRL=0.89; OTX1=0.86;   |
| rs3759283   | chr12 | 8125378   | AGTTTAC/TCITTGG  | TTACCTT  | TTATCTT  | 1.239   | 1.655   | -1.533       | 0.636       | FOXD2=0.96; FOXL1=0.91; FOXO3=0.91; |
| rs9937638   | chr16 | 73494722  | AGCTTTC/ATCTGCC  | TTCTCTG  | TTATCTG  | 1.178   | 1.756   | -1.916       | 0.765       | SOX10=0.93; SPIB=0.88; SPI1=0.88;   |



**Supplemental Table S2: List of 100, 1000 genomes version 3 imputed and DHS intersected SNPs with Sasquatch predictions.** Population indicates the population background based on which the respective variant was identified as a proxy SNP for one of original 75 SNP<sup>15</sup> (orig 75).

| ID          | Chr   | Pos hg18  | Ref | Var | Population | Sequence Ref  | Sequence Var  | k-mer Ref | k-mer Var | SFR Ref | SFR Var | Total Damage | % Change | Class       |
|-------------|-------|-----------|-----|-----|------------|---------------|---------------|-----------|-----------|---------|---------|--------------|----------|-------------|
| rs608662    | chr6  | 139839444 | G   | A   | AS,CEU     | ACTTGCGCGCAGG | ACTTGACGCAGG  | GCGCAGG   | ACGCAGG   | 2.135   | 1.28    | 4.138        | 0.753    | strong loss |
| rs9890212   | chr17 | 27169890  | G   | C   | AS,CEU     | TGCCGGGGGCGTC | TGCCGGCGGCGTC | GGGGGCG   | GGCGGCG   | 3.113   | 1.538   | 3.571        | 0.745    | strong loss |
| rs11575895  | chr17 | 43971785  | A   | G   | AS,CEU     | CCCCTAGTGGCC  | CCCCTGGTGGCC  | CCCTAG    | CCCTGG    | 3.188   | 1.351   | 3.502        | 0.84     | strong loss |
| rs1369312   | chr15 | 66084407  | G   | T   | AS         | AATCCCACGCG   | AATCCCTACGCG  | CGCACGC   | CTCACGC   | 2.567   | 1.212   | 3.269        | 0.865    | strong loss |
| rs3181215   | chr17 | 27077331  | A   | G   | CEU        | TGGCCTAGATGTT | TGGCCTGGATGTT | CTAGATG   | CTGGATG   | 3.027   | 1.234   | 2.219        | 0.885    | strong loss |
| rs34731408  | chr10 | 45961020  | C   | T   | AS,CEU     | TCCTCCCCCTACC | TCCTCTCCTACC  | CCCCCTA   | CCTCCTA   | 1.958   | 1.419   | 2.13         | 0.563    | strong loss |
| rs71496621  | chr10 | 46076348  | T   | C   | AS,CEU     | AGAGCTTAGCCCC | AGAGCTCAGCCCC | TAGCCCC   | CAGCCCC   | 2.339   | 1.279   | 2.088        | 0.792    | strong loss |
| rs2923444   | chr8  | 42397004  | C   | T   | AS,CEU     | AGCACCCGCCGG  | AGCACCTGCCGG  | CCCGCCC   | CCTGCC    | 2.782   | 1.128   | 2.044        | 0.928    | strong loss |
| rs17577024  | chr17 | 44186252  | G   | A   | AS,CEU     | GTCCAAGTATACA | GTCCAAATATACA | GTATACA   | ATATACA   | 1.927   | 1.202   | 1.866        | 0.782    | strong loss |
| rs76029685  | chr10 | 46168346  | G   | A   | AS         | TGCCGGGGCGCCA | TGCCGGAGCGCCA | CGGGGCG   | CGGAGCG   | 2.012   | 1.259   | 1.748        | 0.744    | strong loss |
| rs131806    | chr22 | 50963965  | C   | G   | AS         | TCCCTGCGCTCTG | TCCCTGGGCTCTG | CCTGCGC   | CCTGGGC   | 2.09    | 1.169   | 1.533        | 0.845    | strong loss |
| rs769236    | chr4  | 122745038 | C   | T   | AS,CEU     | GCCCCCGGAGCG  | GCCCGTGGAGCG  | GCCCGCC   | GCCCGCT   | 1.707   | 1.093   | 1.483        | 0.868    | strong loss |
| rs2047866   | chr15 | 76136194  | C   | T   | CEU        | GTGAGGCGCCCGG | GTGAGGTGCCCGG | AGGCGCC   | AGGTGCC   | 1.554   | 1.104   | 1.329        | 0.813    | strong loss |
| rs75820736  | chr10 | 46076236  | C   | A   | AS,CEU     | TGTGCGCTAGGAC | TGTGCGATAGGAC | TGTGCGC   | TGTGCGA   | 2.239   | 1.23    | 1.109        | 0.815    | strong loss |
| rs643381    | chr6  | 139839423 | C   | A   | AS,CEU     | CCCCCCCAGGGC  | CCCCCACAGGGC  | CCCCCCC   | CCCCCAC   | 1.892   | 1.529   | 1.085        | 0.407    | strong loss |
| rs242561    | chr17 | 44026548  | T   | C   | AS,CEU     | CGATTCTGCTGAG | CGATTCCGCTGAG | TCTGCTG   | TCCGCTG   | 1.725   | 1.165   | 1.082        | 0.773    | strong loss |
| rs55714296  | chr17 | 44137189  | A   | T   | AS,CEU     | CCATTACCTGCC  | CCATTCTCCTGCC | CACCTGC   | CTCCTGC   | 1.682   | 1.121   | 1.052        | 0.822    | strong loss |
| rs9369425   | chr6  | 43810974  | G   | A   | CEU        | TGGAACGTGTAT  | TGGAACATGTAT  | ACGTTGT   | ACATTGT   | 1.768   | 1.276   | 0.94         | 0.641    | weak loss   |
| rs10758656  | chr9  | 4852599   | A   | G   | AS,CEU     | GTAGATAAGGTGC | GTAGATGAGGTGC | AGATAAG   | AGATGAG   | 1.877   | 1.146   | 0.874        | 0.834    | weak loss   |
| rs41384744  | chr17 | 44137070  | A   | G   | AS,CEU     | GGAACTAAGAGAG | GGAAGTGAAGAG  | CTAAGAG   | CTGAGAG   | 1.486   | 1.127   | 0.856        | 0.739    | weak loss   |
| rs17577052  | chr17 | 44186301  | T   | C   | AS,CEU     | AACTACTAACAAG | AACTACCAACAAG | CTACTAA   | CTACCAA   | 1.549   | 1.25    | 0.792        | 0.545    | weak loss   |
| rs113417378 | chr17 | 44270809  | A   | G   | AS,CEU     | GCGAGCAAGCGGG | GCGAGCGAGCGGG | GCAAGCG   | GCGAGCG   | 1.592   | 1.207   | 0.789        | 0.651    | weak loss   |

|            |       |           |   |   |               |                |               |         |          |       |       |       |       |           |
|------------|-------|-----------|---|---|---------------|----------------|---------------|---------|----------|-------|-------|-------|-------|-----------|
| rs737092   | chr20 | 55990405  | T | C | AS,CEU,orig75 | TAAGTGTCTGGCT  | TAAGTGCCTGGCT | GTCTGGC | GCCTGGC  | 1.307 | 1.101 | 0.679 | 0.673 | weak loss |
| rs4737010  | chr8  | 41630447  | G | A | AS,CEU        | GCCAGCGACCACC  | GCCAGCAACCACC | GACCACC | AACCACC  | 1.931 | 1.27  | 0.67  | 0.71  | weak loss |
| rs4926725  | chr1  | 47679366  | A | T | CEU           | ATGGCTACAGCAG  | ATGGCTTCAGCAG | ATGGCTA | ATGGCTT  | 1.4   | 1.182 | 0.596 | 0.544 | weak loss |
| rs6592965  | chr7  | 50427982  | G | A | AS,CEU        | TGAGAGGGAATGG  | TGAGAGAGAATGG | GAGAGGG | GAGAGAG  | 1.387 | 1.118 | 0.571 | 0.695 | weak loss |
| rs2696633  | chr17 | 44270059  | A | T | AS,CEU        | CGGGGGATTTTTTC | CGGGGGTTTTTTC | GGGATTT | GGGTTTT  | 1.542 | 1.17  | 0.559 | 0.685 | weak loss |
| rs7199443  | chr16 | 67841129  | T | G | AS,CEU        | CAGAGATGAGGGT  | CAGAGAGGAGGGT | GAGATGA | GAGAGGA  | 1.275 | 1.038 | 0.51  | 0.861 | weak loss |
| rs1175550  | chr1  | 3691528   | A | G | AS,CEU,orig75 | GCCTAGATTGGGC  | GCCTAGGTTGGGC | CTAGATT | CTAGGTT  | 1.232 | 1.047 | 0.504 | 0.8   | weak loss |
| rs11865131 | chr16 | 163667    | G | A | AS,CEU        | TCCTGTGGGGGTG  | TCCTGTAGGGGTG | TGTGGGG | TGTAGGG  | 1.538 | 1.31  | 0.497 | 0.424 | neutral   |
| rs2271176  | chr4  | 122791601 | G | C | AS,CEU        | GCCTAGGTCCTGG  | GCCTAGCTCCTGG | CTAGGTC | CTAGCTC  | 1.459 | 1.187 | 0.476 | 0.593 | neutral   |
| rs6808837  | chr3  | 141217954 | T | C | AS,CEU        | TCTAGATTAAGCT  | TCTAGACTAAGCT | TCTAGAT | TCTAGAC  | 1.243 | 1.672 | 0.45  | 0.638 | neutral   |
| rs439558   | chr17 | 43717803  | T | C | AS,CEU        | CACAAGTGCTGGA  | CACAAGCGCTGGA | TGCTGGA | CGCTGGA  | 1.63  | 1.159 | 0.44  | 0.748 | neutral   |
| rs11670503 | chr19 | 4458063   | A | G | CEU           | AGGCCAACTGAAC  | AGGCCAGCTGAAC | CAACTGA | CAGCTGA  | 1.573 | 1.131 | 0.409 | 0.771 | neutral   |
| rs79337279 | chr10 | 46153540  | G | T | AS            | TTCTTAGGTGGAA  | TTCTTATGTGGAA | TAGGTGG | TATGTGG  | 2.426 | 1.54  | 0.403 | 0.621 | neutral   |
| rs12126653 | chr1  | 3773815   | C | G | AS            | CCACCCCAGGCCG  | CCACCCGAGGCCG | CCACCCC | CCACCCG  | 1.48  | 1.229 | 0.384 | 0.522 | neutral   |
| rs11085824 | chr19 | 13001547  | A | G | AS,CEU        | GCTAAGATCGCCC  | GCTAAGGTCGCCC | AGATCGC | AGGTGCG  | 1.4   | 1.193 | 0.373 | 0.517 | neutral   |
| rs4926524  | chr1  | 47679258  | C | T | CEU           | CAACTGCGGCCCA  | CAACTGTGGCCCA | AACTGCG | AACTGTG  | 1.438 | 1.186 | 0.35  | 0.576 | neutral   |
| rs4490057  | chr17 | 76375095  | A | G | AS,CEU        | TGCTCCATTATCG  | TGCTCCGTTATCG | TCCATTA | TCCGTTA  | 1.393 | 1.173 | 0.321 | 0.56  | neutral   |
| rs1546723  | chr6  | 109625879 | G | A | AS,CEU        | GGGAGCGGAGTGG  | GGGAGCAGAGTGG | GCGGAGT | GCAGAGT  | 1.729 | 1.16  | 0.273 | 0.78  | neutral   |
| rs140491   | chr22 | 21922364  | T | C | AS,CEU        | CCGATCTGAGGGC  | CCGATCCGAGGGC | GATCTGA | GATCCGA  | 1.282 | 1.164 | 0.215 | 0.418 | neutral   |
| rs12718598 | chr7  | 50428445  | T | C | AS,CEU,orig75 | GCCCCATGTCGTC  | GCCCCACGTCGTC | CCCATGT | CCCACGT  | 1.239 | 1.726 | 0.214 | 0.671 | neutral   |
| rs9901219  | chr17 | 37558369  | T | G | AS,CEU        | CCAGGATCTGTA   | CCAGGAGCCTGTA | AGGATCC | AGGAGCC  | 1.259 | 1.054 | 0.2   | 0.79  | neutral   |
| rs77127734 | chr11 | 73018413  | T | A | CEU           | AAGTTTTACAAC   | AAGTTTACACAAC | TTTACA  | TTACACA  | 1.419 | 1.223 | 0.17  | 0.467 | neutral   |
| rs2285089  | chr22 | 32898291  | G | A | AS,CEU        | AAAAGCGGAGACT  | AAAAGCAGAGACT | AGCGGAG | AGCAGAG  | 1.129 | 1.47  | 0.035 | 0.725 | neutral   |
| rs12609866 | chr19 | 33184412  | C | T | AS,CEU        | CCACAGCGGAAGG  | CCACAGTGGAAGG | CAGCGGA | CAGTGGGA | 1.085 | 1.186 | 0.031 | 0.54  | neutral   |
| rs2572207  | chr15 | 66070693  | C | T | AS,CEU,orig75 | GTAACACTGTATA  | GTAACATTGTATA | CTGTATA | TTGTATA  | 1.059 | 1.347 | 0.015 | 0.829 | neutral   |
| rs8113575  | chr19 | 13030280  | G | A | AS,CEU        | TTGGGAGCAGGAC  | TTGGGAACAGGAC | TTGGGAG | TTGGGAA  | 1.264 | 1.174 | -0.02 | 0.34  | neutral   |

|             |       |           |   |   |               |               |                  |         |         |       |       |        |       |           |
|-------------|-------|-----------|---|---|---------------|---------------|------------------|---------|---------|-------|-------|--------|-------|-----------|
| rs11248850  | chr16 | 163598    | G | A | AS,CEU,orig75 | CTTGAGGGAGCAG | CTTGAGAGAGCAG    | TGAGGGA | TGAGAGA | 1.005 | 1.225 | -0.071 | 0.976 | neutral   |
| rs20549     | chr16 | 67969930  | A | G | AS,CEU        | TAGATAACGCGTG | TAGATAGCAGCAGCAG | ACGCGTG | GCGCGTG | 1.695 | 2.605 | -0.08  | 0.567 | neutral   |
| rs11240734  | chr1  | 203651824 | C | T | AS,CEU        | TTATGGCTGCTCT | TTATGGTTGCTCT    | TTATGGC | TTATGGT | 1.757 | 1.52  | -0.1   | 0.313 | neutral   |
| rs7196789   | chr16 | 67927124  | C | T | CEU           | CGTAGGCTTGTTT | CGTAGGTTTGTTT    | CTTGTTT | TTTGTTT | 1.172 | 1.34  | -0.135 | 0.493 | neutral   |
| rs2304903   | chr15 | 75315778  | A | G | AS,CEU        | AGGGCCAGGGTTT | AGGGCCGGGGTTT    | CAGGGTT | CGGGGTT | 1.151 | 1.546 | -0.139 | 0.724 | neutral   |
| rs6778081   | chr3  | 195819205 | C | T | AS,CEU        | TTGAGACGGAGTT | TTGAGATGGAGTT    | CGGAGTT | TGGAGTT | 1.284 | 1.115 | -0.197 | 0.597 | neutral   |
| rs11628273  | chr14 | 65509878  | C | T | CEU           | CTGGAACGCCTA  | CTGGAATGGCCTA    | CGGCCTA | TGGCCTA | 1.132 | 1.317 | -0.255 | 0.583 | neutral   |
| rs3811742   | chr4  | 122722693 | C | G | AS,CEU        | TCGGGTCTCAAGG | TCGGGTGTCAAGG    | GTCTCAA | GTGTCAA | 1.337 | 1.684 | -0.282 | 0.507 | neutral   |
| rs1476792   | chr11 | 67196237  | T | C | AS,CEU        | ATTAAGTTCTGAT | ATTAAGCTCTGAT    | TTAAGTT | TTAAGCT | 1.027 | 1.202 | -0.284 | 0.866 | neutral   |
| rs12611419  | chr19 | 33184369  | A | G | AS,CEU        | AGCAGCAGCAAGA | AGCAGCGCAAGA     | GCAGCAG | GCAGCGG | 1.356 | 1.118 | -0.294 | 0.668 | neutral   |
| rs7206671   | chr16 | 67807146  | A | G | AS,CEU        | GAGTATAGCACCT | GAGTATGGCACCT    | ATAGCAC | ATGGCAC | 1.431 | 1.909 | -0.318 | 0.526 | neutral   |
| rs78999882  | chr10 | 46076813  | A | T | AS            | CTGCACAGTACAA | CTGCACTGTACAA    | GCACAGT | GCACTGT | 1.253 | 1.518 | -0.357 | 0.511 | neutral   |
| rs11042154  | chr11 | 9029700   | G | A | CEU           | TATCCAGATGTGT | TATCCAAATGTGT    | TATCCAG | TATCCAA | 1.18  | 1.721 | -0.365 | 0.751 | neutral   |
| rs11089620  | chr22 | 21922456  | C | G | CEU           | GGAGCCCGCGCCG | GGAGCCGGCGCCG    | CCGCGCC | CGGCGCC | 1.55  | 1.737 | -0.377 | 0.254 | neutral   |
| rs6692253   | chr1  | 47680527  | G | A | CEU           | ACCTGTGAGCACA | ACCTGTAAGCACA    | GTGAGCA | GTAAGCA | 1.127 | 1.271 | -0.377 | 0.531 | neutral   |
| rs10751450  | chr1  | 203650945 | C | T | AS,CEU        | CTGTGGCCCTATC | CTGTGGTCCTATC    | CCCTATC | TCCTATC | 1.181 | 1.418 | -0.394 | 0.567 | neutral   |
| rs2072814   | chr22 | 32870769  | C | T | CEU           | CGGCTCCAGGAGG | CGGCTCTAGGAGG    | TCCAGGA | TCTAGGA | 1.158 | 1.436 | -0.424 | 0.637 | neutral   |
| rs12937114  | chr17 | 42325073  | A | G | AS,CEU        | TTTGGCAGCTGCC | TTTGGCGGCTGCC    | TTGGCAG | TTGGCGG | 1.719 | 1.36  | -0.441 | 0.5   | neutral   |
| rs7177266   | chr15 | 76195940  | C | T | AS,CEU        | AATTAGCTGGGCG | AATTAGTTGGGCG    | AGCTGGG | AGTTGGG | 1.246 | 1.416 | -0.46  | 0.408 | neutral   |
| rs80137870  | chr19 | 33182750  | C | T | AS,CEU        | CAACGCCAGAGGC | CAACGCTAGAGGC    | CCAGAGG | CTAGAGG | 1.456 | 1.772 | -0.476 | 0.409 | neutral   |
| rs112035106 | chr10 | 46089925  | C | T | AS,CEU        | TCCGCTCGGCCCG | TCCGCTTGGCCCG    | GCTCGGC | GCTTGCC | 1.159 | 1.369 | -0.492 | 0.569 | neutral   |
| rs4737009   | chr8  | 41630405  | G | A | AS,CEU,orig75 | TTTACCGAGAAAG | TTTACCAAGAAAG    | GAGAAAG | AAGAAAG | 1.018 | 1.249 | -0.511 | 0.929 | weak gain |
| rs76491632  | chr10 | 45966598  | T | C | AS            | TATCCATTATAAA | TATCCACTATAAA    | TCCATTA | TCCACTA | 1.393 | 1.875 | -0.525 | 0.551 | weak gain |
| rs7183915   | chr15 | 66097378  | A | C | AS            | TACCTGAACTCCA | TACCTGCACTCCA    | TGAACTC | TGCACTC | 1.096 | 1.276 | -0.544 | 0.651 | weak gain |
| rs17616316  | chr14 | 103822762 | C | G | AS,CEU,orig75 | CCACTACAAGGAA | CCACTAGAAGGAA    | ACTACAA | ACTAGAA | 3.307 | 1.098 | -0.566 | 0.957 | weak gain |
| rs7114009   | chr11 | 73115314  | A | G | CEU           | AAGCCTAGCGGAT | AAGCCTGGCGGAT    | AGCGGAT | GGCGGAT | 1.235 | 1.459 | -0.567 | 0.489 | weak gain |

|             |       |           |   |   |               |                |               |         |         |       |       |        |       |             |
|-------------|-------|-----------|---|---|---------------|----------------|---------------|---------|---------|-------|-------|--------|-------|-------------|
| rs369043198 | chr17 | 43669800  | A | G | AS,CEU        | GAACACAGGTCTG  | GAACACGGGTCTG | CAGGTCT | CGGGTCT | 1.135 | 1.387 | -0.64  | 0.652 | weak gain   |
| rs1541253   | chr1  | 203652040 | T | C | AS,CEU        | GACAACACTATC   | GACAACCACTATC | ACTACTA | ACCACTA | 1.526 | 2.855 | -0.701 | 0.716 | weak gain   |
| rs3752531   | chr12 | 121157851 | A | G | CEU           | GAGTAGATAGGGG  | GAGTAGGTAGGGG | ATAGGGG | GTAGGGG | 1.29  | 1.687 | -0.727 | 0.578 | weak gain   |
| rs901683    | chr10 | 45966422  | G | A | AS,CEU,orig75 | TCTGTGGCTTTTC  | TCTGTGACTTTTC | CTGTGGC | CTGTGAC | 1.249 | 1.623 | -0.847 | 0.6   | weak gain   |
| rs2974750   | chr19 | 13044544  | C | A | AS,CEU        | CGGGCCCCGGGTGG | CGGGCCAGGGTGG | GGGCCCG | GGGCCAG | 1.143 | 1.52  | -0.867 | 0.725 | weak gain   |
| rs2239760   | chr12 | 121163518 | C | A | CEU           | CGGTTCTCGCCT   | CGGTTCATCGCCT | CGGTTCC | CGGTTCA | 1.032 | 1.561 | -0.884 | 0.944 | weak gain   |
| rs12911421  | chr15 | 75287822  | C | A | CEU           | GGAAGTCTCGCGA  | GGAAGTATCGCGA | AGTCTCG | AGTATCG | 1.238 | 1.639 | -0.913 | 0.627 | weak gain   |
| rs2238368   | chr16 | 170328    | C | T | CEU           | GACAGACATCTA   | GACAGATATCTA  | ACAGACA | ACAGATA | 1.252 | 1.639 | -0.995 | 0.605 | weak gain   |
| rs1541252   | chr1  | 203651927 | T | C | AS,CEU        | GTCTACTACTACA  | GTCTACCACTACA | ACTACTA | ACCACTA | 1.526 | 2.855 | -1.023 | 0.716 | strong gain |
| rs2075672   | chr7  | 100240296 | A | G | AS,CEU,orig75 | GAAGGAAGGCATA  | GAAGGAGGGCATA | GAAGGCA | GAGGGCA | 1.149 | 1.871 | -1.029 | 0.829 | strong gain |
| rs2303316   | chr17 | 37704217  | A | G | AS            | TAGTCAAGCAGTA  | TAGTCAGGCAGTA | AGCAGTA | GGCAGTA | 1.421 | 2.328 | -1.044 | 0.683 | strong gain |
| rs35968565  | chr10 | 46076196  | G | T | AS,CEU        | GCTTGAGACAATA  | GCTTGATACAATA | AGACAAT | ATACAAT | 1.237 | 1.539 | -1.221 | 0.56  | strong gain |
| rs7547793   | chr1  | 203653544 | A | C | AS,CEU        | CAGTGGAATGATC  | CAGTGGCATGATC | TGGAATG | TGGCATG | 1.204 | 1.508 | -1.262 | 0.599 | strong gain |
| rs589235    | chr6  | 139839960 | T | C | AS,CEU        | ATCTCCTCTCCCC  | ATCTCCCCTCCCC | CCTCTCC | CCCCTCC | 1.082 | 1.52  | -1.306 | 0.842 | strong gain |
| rs79589869  | chr17 | 43930238  | C | A | AS,CEU        | AATGCTCCTGTGC  | AATGCTACTGTGC | TGCTCCT | TGCTACT | 1.05  | 1.312 | -1.418 | 0.839 | strong gain |
| rs11650282  | chr17 | 27090741  | C | G | AS,CEU        | ATCCTTCTGACAA  | ATCCTTGTGACAA | CCTTCTG | CCTTGTG | 1.294 | 1.771 | -1.46  | 0.619 | strong gain |
| rs3747093   | chr22 | 21984379  | G | A | AS,CEU        | CTGCCCGGGCCCC  | CTGCCCAGGCCCC | GGGCCCC | AGGCCCC | 1.347 | 2.352 | -1.53  | 0.744 | strong gain |
| rs75595592  | chr10 | 46039930  | A | G | AS,CEU        | CCACCAACTAAAG  | CCACCAGCTAAAG | CCACCAA | CCACCAG | 1.207 | 2.872 | -1.53  | 0.89  | strong gain |
| rs12459922  | chr19 | 4455862   | A | G | CEU           | CACCTGACGGCCC  | CACCTGGCGGCC  | CACCTGA | CACCTGG | 1.203 | 1.736 | -1.68  | 0.724 | strong gain |
| rs9902953   | chr17 | 27139834  | C | A | AS,CEU        | GCGATACCTCCCA  | GCGATAACTCCCA | GCGATAC | GCGATAA | 1.542 | 2.265 | -2     | 0.572 | strong gain |
| rs11866877  | chr16 | 170044    | G | A | CEU           | AGATCTGGATAAG  | AGATCTAGATAAG | CTGGATA | CTAGATA | 1.102 | 1.696 | -2.01  | 0.854 | strong gain |
| rs8107610   | chr19 | 33186579  | C | T | AS,CEU        | TGGCTTCGGCAGT  | TGGCTTGGCAGT  | CGGCAGT | TGGCAGT | 1.219 | 1.94  | -2.093 | 0.767 | strong gain |
| rs73425119  | chr18 | 43753831  | G | C | AS,CEU        | AAGCCCCGGGAGC  | AAGCCCCGGGAGC | AGCCCCG | AGCCCCG | 1.195 | 2.297 | -2.19  | 0.849 | strong gain |
| rs13069307  | chr3  | 142315074 | G | A | AS,CEU        | GCGCCCGTCCACC  | GCGCCCATCCACC | CGCCCGT | CGCCCAT | 1.36  | 2.565 | -2.418 | 0.77  | strong gain |
| rs10751451  | chr1  | 203650978 | C | T | AS,CEU        | ATCTTACCGCTCC  | ATCTTATCGCTCC | TTACCGC | TTATCGC | 1.299 | 2.427 | -2.922 | 0.791 | strong gain |
| rs62064663  | chr17 | 44080039  | T | G | AS,CEU        | AAGCCTTGGGGCG  | AAGCCTGGGGCG  | TGGGGCG | GGGGGCG | 1.737 | 3.113 | -2.943 | 0.651 | strong gain |

**Supplemental Table S3. Alignment and peak calling details.**

| ID                                         | In-house DNase-seq mapping pipeline run details                                     | Parameters peak caller        |
|--------------------------------------------|-------------------------------------------------------------------------------------|-------------------------------|
| Human                                      |                                                                                     |                               |
| WIMM_primary_erythroid_Fibach_Fade8        | trimming=TRUE; flashing=FALSE;<br>bowtie1 -m 2 --maxins 356 --chunkmb 256 --lanes 1 | merge=10; contig=20; depth=40 |
| DFCI_LNCaP_Vehicle                         | trimming=TRUE; flashing=TRUE;<br>bowtie1 -m 2 --maxins 350 --chunkmb 256 --lanes 1  | merge=7; contig=12; depth=12  |
| DFCI_MCF7                                  | trimming=TRUE; flashing=TRUE;<br>bowtie1 -m 2 --maxins 350 --chunkmb 256 --lanes 1  | merge=7; contig=12; depth=12  |
| Mouse                                      |                                                                                     |                               |
| HHMI_liDNase_mESC_100cells                 | trimming=TRUE; flashing=TRUE;<br>bowtie1 -m 2 --maxins 350 --chunkmb 256 --lanes 1  | macs2 default                 |
| HHMI_liDNase_mESC_30cells                  | trimming=TRUE; flashing=TRUE;<br>bowtie1 -m 2 --maxins 350 --chunkmb 256 --lanes 1  | macs2 default                 |
| WTHG_C57bl6_erythroblasts_term_diff_rep3_2 | trimming=TRUE; flashing=TRUE;<br>bowtie1 -m 2 --maxins 350 --chunkmb 256 --lanes 1  | macs2 default                 |
