# Supplementary material for: Sasquatch: predicting the impact of regulatory SNPs on transcription factor binding from cell- and tissue-specific DNase footprints
Source: HighWire-hosted journal article supplement (doi:10.1101/gr.220202.117), 2017-09-13
Supplement: Supplemental_Software.tar.gz [file sasq_R_reference_manual.pdf › Supplementary_Material_Software/R_utility/sasq_R_reference_manual.pdf]

# Reference Manual: Sasquatch R-Tool

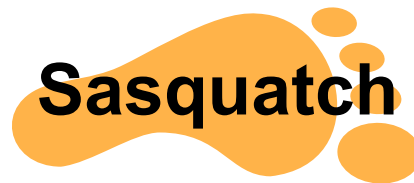

**Version:** 0.1  
**Date:** June 16, 2017  
**Authors:** Ron Schwessinger, Maria Suci, Simon J McGowan, Jelena M Telenius, Douglas R. Higgs & Jim R. Hughes  
**Groups:** Genome Biology and Computational Biology Research Group, WIMM, Oxford  
**Contact:** Ron Schwessinger, [ron.schwessinger@msdtc.ox.ac.uk](mailto:ron.schwessinger@msdtc.ox.ac.uk)  
CBRG, [managers@molbiol.ox.ac.uk](mailto:managers@molbiol.ox.ac.uk)  
Jim Hughes, [jim.hughes@imm.ox.ac.uk](mailto:jim.hughes@imm.ox.ac.uk)  
**License:** [GPLv3](#)  
**Requires:** ggplot2, RColorBrewer  
**Recommends:** Biostrings, TFBSTools, pbapply

## Contents

|                                        |    |
|----------------------------------------|----|
| Contents . . . . .                     | 1  |
| CalcSFR . . . . .                      | 1  |
| CompareSequences . . . . .             | 2  |
| DecodeKmer . . . . .                   | 4  |
| DissectSequence . . . . .              | 5  |
| GetCount . . . . .                     | 5  |
| GetFootprint . . . . .                 | 6  |
| GetFootprintStrand . . . . .           | 7  |
| GetPossibleMutations . . . . .         | 8  |
| GetSFR . . . . .                       | 9  |
| GrepProfile . . . . .                  | 10 |
| InSilicoMutation . . . . .             | 11 |
| InSilicoMutationPlot . . . . .         | 13 |
| MakeInSilicoMutationTrackHub . . . . . | 14 |
| PlotOverlap . . . . .                  | 16 |
| PlotOverlapKmers . . . . .             | 18 |
| PlotSingle . . . . .                   | 19 |
| PlotSingleKmer . . . . .               | 20 |
| PlotSingleStrands . . . . .            | 21 |
| PreLoadProfiles . . . . .              | 22 |
| PreLoadVocab . . . . .                 | 23 |
| PruneProfile . . . . .                 | 24 |
| QueryJaspar . . . . .                  | 24 |

|                             |    |
|-----------------------------|----|
| QueryJasparBatch. . . . .   | 25 |
| QueryLongSequence . . . . . | 26 |
| RefVarBatch . . . . .       | 28 |
| SmoothProfile. . . . .      | 30 |
| SobelBorders . . . . .      | 30 |
| Sobeln . . . . .            | 31 |

---

## CalcSFR

---

### Description

Calculate the Shoulder-to-Footprint-Ratio of a given footprint profile and estimated shoulder positions and ranges.

### Usage

```
CalcSFR(profile,
         upstream.shoulder.position,
         upstream.shoulder.position,
         upstream.shoulder.range,
         upstream.shoulder.range)
```

### Arguments

**profile** input cut profile (should be smoothed)  
**us.mid** center bp position of the upstream shoulder (as estimated from *SobelBorders*)  
**ds.mid** center bp position of the downstream shoulder  
**range.us** range in bp of the upstream shoulder (as estimated from *SobelBorders*)  
**range.ds** range in bp of the downstream shoulder

### Value

Returns the SFR as single numeric value.

### Examples

```
frag.type <- "DNase"

data.dir <- "./my_sasq_database/human/DNase/"

tissue <- "blood_tissue"

kmer <- "CACGTG"

# get the average profile for a single kmer
profile<- GetFootprint(
  kmer=kmer,
  tissue=tissue,
  data.dir=data.dir,
  frag.type=frag.type,
  smooth=TRUE
)
```

```
# estimate the shoulders from the profile
sh <- SobelBorders(profile, kl=nchar(kmer))

#calculate the SFR
CalcSFR(profile, sh$us, sh$ds, sh$range.us, sh$range.ds)
```

---

## CompareSequences

---

### Description

Wrapper function to compare two input sequences on a kmer basis. Both sequence are split up and compared pairwise, calculating the damage. Total damage is calculated either as summed up or as highest pairwise damage, as chosen. Overlay plots for none, all or only the highest scoring pair are created as specified.

(If preload = TRUE and if vocab.flag = FALSE, preload.profiles has to be submitted. If vocab.flag = TRUE with preload = TRUE then preload.vocab has to be submitted. If preload =TRUE and plots should be generated, preload.profiles have to be provided.)

### Usage

```
CompareSequences(sequence1,
                  sequence2,
                  kl,
                  damage.mode="exhaustive",
                  tissue,
                  data.dir,
                  pnorm.tag,
                  vocab.flag=FALSE,
                  vocab.file=paste0(data.dir,"/",tissue,
                                   "/vocabulary_",tissue,".txt"),
                  frag.type,
                  plots="highest",
                  smooth=TRUE,
                  ylim=c(0,0.01),
                  xlim=c(-125,125),
                  plot.shoulders=FALSE,
                  preload,
                  preload.vocab="",
                  preload.profiles="")
```

## Arguments

|                         |                                                                                                                                                                                                                                                                                                           |
|-------------------------|-----------------------------------------------------------------------------------------------------------------------------------------------------------------------------------------------------------------------------------------------------------------------------------------------------------|
| <b>sequence1</b>        | input sequence 1, character string (usually length of kmer or a window over a variant)                                                                                                                                                                                                                    |
| <b>sequence2</b>        | input sequence 2, character string, required to have same length as sequence 1                                                                                                                                                                                                                            |
| <b>kl</b>               | length of the kmer windows, to split up the sequences                                                                                                                                                                                                                                                     |
| <b>damage.mode</b>      | { <b>"exhaustive"</b> , <b>"local"</b> } mode to calculate the total damage for the comparison. <b>"exhaustive"</b> sum over all pair-wise comparison. <b>"local"</b> extract the highest pair-wise damage score. [default= <b>"exhaustive"</b> ]                                                         |
| <b>tissue</b>           | name of tissue directory of interest                                                                                                                                                                                                                                                                      |
| <b>data.dir</b>         | path to directory containing preprocessed data                                                                                                                                                                                                                                                            |
| <b>pnorm.tag</b>        | tag indicating which background propensities were used for normalisation                                                                                                                                                                                                                                  |
| <b>vocab.flag</b>       | {FALSE, TRUE} flag if a precalculated vocabulary file is present and should be used [default=FALSE]<br>Speeds up the analysis but precalculation is time consuming, therefore has to be done manually after initial processing of new tissue data. Recommended if tissue is frequently used for analysis. |
| <b>vocab.file</b>       | path to precalculated vocabulary file<br>[default=paste0(data.dir,"",tissue,"vocabulary_",tissue,".txt")]                                                                                                                                                                                                 |
| <b>frag.type</b>        | { <b>"DNase"</b> , <b>"ATAC"</b> } fragmentation type.                                                                                                                                                                                                                                                    |
| <b>plots</b>            | {FALSE, <b>"highest"</b> , <b>"all"</b> } indicate if and what overlay plots to retrieve [default= <b>"highest"</b> ]<br><b>FALSE</b> no plots, <b>highest</b> only the highest scoring pair, <b>"all"</b> plots for all pairs                                                                            |
| <b>smooth</b>           | {FALSE, TRUE} smooth the profile [default=TRUE]                                                                                                                                                                                                                                                           |
| <b>ylim</b>             | y-limit for plots [default c(0,0.01)]                                                                                                                                                                                                                                                                     |
| <b>xlim</b>             | x-limit for plots [default c(-125,125)]                                                                                                                                                                                                                                                                   |
| <b>plot.shoulders</b>   | {FALSE, TRUE} print the estimated shoulders with the overlay plots [default=FALSE]                                                                                                                                                                                                                        |
| <b>preload</b>          | flag [FALSE/TRUE] if to use preloaded average profiles [default=FALSE]                                                                                                                                                                                                                                    |
| <b>preload.vocab</b>    | preloaded vocabulary data frame from PreLoadVocab()                                                                                                                                                                                                                                                       |
| <b>preload.profiles</b> | two dataframe list with the preloaded profiles from PreLoadProfiles()                                                                                                                                                                                                                                     |

## Value

Returns a list containing two data frames and a plot or list of plots, depending on how the plotting was specified.

**...\$summary:** a data frame listing the reference and variant sequence with highest scoring kmer pair  
**...\$df:** data frame containing the pair-wise results per row (kmer and SFR from reference and variant and the damage)

**...\$plot:** Overlay plot(s), either single ggplot2 plot or list of plots depending on mode selected for "plots"

## Examples

```
frag.type <- "DNase"
data.dir <- "./my_sasq_database/human/DNase/"
tissue <- "blood_tissue"
pnorm.tag <- "h_ery_1"

comp <- CompareSequences(
  sequence1="CAGTTTCATGAGG",
  sequence2="CAGTTTATGAGG",
  kl=7,
  data.dir=data.dir,
```

```

pnorm.tag=pnorm.tag,
damage.mode="exhaustive",
tissue=tissue,
vocab.flag=TRUE,
frag.type="DNase",
plots="highest"
)

#With preload
vocabulary <- PreLoadVocab(data.dir, tissue)

comp <- CompareSequences(
  sequence1="CAGTTTCATGAGG",
  sequence2="CAGTTTATGAGG",
  kl=7,
  data.dir=data.dir,
  pnorm.tag=pnorm.tag,
  damage.mode="exhaustive",
  tissue=tissue,
  vocab.flag=TRUE,
  frag.type="DNase",
  plots="highest",
  preload=TRUE,
  preload.vocab=vocabulary)

```

---

## DecodeKmer

---

### Description

Takes a kmer and dissects all ambivalent FASTA characters to create a character vector of all matching kmers.

### Usage

```
DecodeKmer(kmer)
```

### Arguments

**kmer** character string, allowing all FASTA standard and ambivalent characters

### Value

Returns a vector containing of all matching definite kmers as character strings.

### Examples

```
DecodeKmer("WGATAA")
```

---

## DissectSequence

---

## Description

Split an input sequence into kmer windows.

## Usage

```
DissectSequence(sequence, kl, list=FALSE)
```

## Arguments

|                 |                                                                             |
|-----------------|-----------------------------------------------------------------------------|
| <b>sequence</b> | character string, allowing all FASTA standard and ambivalent characters     |
| <b>kl</b>       | length in bp to split the sequence into                                     |
| <b>list</b>     | {FALSE, TRUE} select if output should be a list or a vector [default=FALSE] |

## Value

Returns a vector or list of all kmers.

## Examples

```
DissectList("AGGGATACGTAGACGGTGTAA", kl=7, list=FALSE)
```

---

## GetCount

---

## Description

Wrapper function to get the count of the k-mer in DHS in the tissue of interest.

## Usage

```
GetCount(kmer, tissue, data.dir, pnorm.tag, frag.type)
```

## Arguments

|                  |                                                                          |
|------------------|--------------------------------------------------------------------------|
| <b>kmer</b>      | input kmer, FASTA characters string 5 - 7 bp                             |
| <b>tissue</b>    | name of tissue directory of interest                                     |
| <b>data.dir</b>  | path to directory containing preprocessed data                           |
| <b>pnorm.tag</b> | tag indicating which background propensities were used for normalisation |
| <b>frag.type</b> | {"DNase", "ATAC"} fragmentation type.                                    |

## Value

Returns the count as single numeric value.

## Examples

```
frag.type <- "DNase"
data.dir <- "./my_sasq_database/human/DNase/"
tissue <- "blood_tissue"
pnorm.tag <- "h_ery_1"

GetCount(kmer="CACGTG", data.dir=data.dir, tissue=tissue, pnorm.tag=pnorm.tag,
         frag.type=frag.type)
```

---

## GetFootprint

---

### Description

Wrapper to retrieve the merged & smoothed profile of kmer.

### Usage

```
GetFootprint(kmer,
             tissue,
             data.dir,
             pnorm.tag,
             frag.type,
             smooth=TRUE,
             smooth.bandwidth=5,
             preload=FALSE,
             preload.profiles="")
```

### Arguments

|                         |                                                                          |
|-------------------------|--------------------------------------------------------------------------|
| <b>kmer</b>             | input kmer, FASTA characters string 5 - 7 bp                             |
| <b>tissue</b>           | name of tissue directory of interest                                     |
| <b>data.dir</b>         | path to directory containing preprocessed data                           |
| <b>pnorm.tag</b>        | tag indicating which background propensities were used for normalisation |
| <b>frag.type</b>        | {"DNase", "ATAC"} fragmentation type.                                    |
| <b>smooth</b>           | {FALSE, TRUE} smooth the profile [default=TRUE]                          |
| <b>smooth.bandwidth</b> | bandwidth to smooth in bp [default=5]                                    |
| <b>preload</b>          | flag: [FALSE/TRUE] if to use preloaded average profiles [default=FALSE]  |
| <b>preload.profiles</b> | two dataframe list with the preloaded profiles from PreLoadProfiles()    |

### Value

Returns list containing the profile and counts. ...\$profile, ...\$count.

### Examples

```
frag.type <- "DNase"
data.dir <- "./my_sasq_database/human/DNase/"
tissue <- "blood_tissue"
pnorm.tag <- "h_ery_1"

fp <- GetFootprint(kmer="CACGTG",
```

```

        tissue=tissue,
        pnorm.tag=pnorm.tag,
        data.dir=data.dir,
        frag.type=frag.type,
        smooth=TRUE)

# With preloading
profiles <- PreLoadKmerProfiles(7, data.dir, tissue, pnorm.tag)
fp <- GetFootprint(kmer="CACGTG",
        tissue=tissue,
        data.dir=data.dir,
        pnorm.tag=pnorm.tag,
        frag.type=frag.type,
        smooth=TRUE,
        preload=TRUE,
        preload.profiles=profiles)

```

---

## GetFootprintStrand

---

### Description

Wrapper to retrieve strand-specific (smoothed) profiles of a kmer from tissue or background

### Usage

```

GetFootprintStrand(kmer,
        tissue,
        data.dir,
        pnorm.tag,
        frag.type,
        smooth=TRUE,
        smooth.bandwidth=5,
        background.flag=FALSE)

```

### Arguments

|                         |                                                                                   |
|-------------------------|-----------------------------------------------------------------------------------|
| <b>kmer</b>             | input kmer, FASTA characters string 5 - 7 bp                                      |
| <b>tissue</b>           | name of tissue directory of interest                                              |
| <b>data.dir</b>         | path to directory containing preprocessed data                                    |
| <b>pnorm.tag</b>        | tag indicating which background propensities were used for normalisation          |
| <b>frag.type</b>        | {"DNase", "ATAC"} fragmentation type.                                             |
| <b>smooth</b>           | {FALSE, TRUE} smooth the profile [default=TRUE]                                   |
| <b>smooth.bandwidth</b> | bandwidth to smooth in bp [default=5]                                             |
| <b>background.flag</b>  | select if to retrieve the profile from the genome-wide background [default=FALSE] |

### Value

Returns list with strand-specific profiles and counts. ...\$profile.plus, ...\$profile.minus, ...\$count.plus, ...\$count.minus



## Examples

```
frag.type <- "DNase"
data.dir <- "./my_sasq_database/human/DNase/"
tissue <- "blood_tissue"
pnorm.tag <- "h_ery_1"

GetFootprintStrand(kmer="CACGTG",
                  tissue=tissue,
                  data.dir=data.dir,
                  pnorm.tag=pnorm.tag,
                  frag.type=frag.type,
                  smooth=TRUE,
                  background.flag=FALSE)
```

---

## GetPossibleMutations

---

### Description

Take a sequence input and split into kmers of length  $kl * 2 - 1$  (e.g. for  $kl$  7 always takes the 13 surrounding bases) and separate into reference and variance. Take the parsed position as index for the first base to mutate. List all possible mutations filling the  $kl$ 'th position in the variant column with all possible substitutions depending on the reference base. First position of the sequence to be mutated is therefore the  $kl$ 'th position of the sequence string.

### Usage

```
GetPossibleMutations(sequence, kl=7, chr=".", position=1)
```

### Arguments

|                 |                                                                         |
|-----------------|-------------------------------------------------------------------------|
| <b>sequence</b> | character string, allowing all FASTA standard and ambivalent characters |
| <b>kl</b>       | length in bp to split the sequence into                                 |
| <b>chr</b>      | chromosome of the sequence to print                                     |
| <b>position</b> | bp position of the sequence to print                                    |

### Value

Returns a 6 column data frame with "chr" "pos" "ref.base" "var.base" "ref.seq" "var.seq"

### Examples

```
GetPossibleMutations(sequence=c("AGGGATACGTAGACGGTGTA"),
                    kl=7, chr="chrX", position=1345990)
```

---

## GetSFR

---

## Description

Wrapper function to get the SFR ratio. If indicated and available, use the present vocabulary file to directly grep the SFR. Else get the average profile, estimate the borders and calculate the SFR. Note that for using the vocabulary file only nonambivalent DNA chars are allowed. For the alternative ambivalent chars are decoded.

If `preload = TRUE` and if `vocab.flag = FALSE`, `preload.profiles` has to be submitted. If `vocab.flag = TRUE` with `preload = TRUE` then `preload.vocab` has to be submitted.

## Usage

```
GetSFR(kmer,
       tissue,
       data.dir,
       pnorm.tag,
       vocab.flag=FALSE,
       vocab.file=paste0(data.dir,"/",tissue,"/vocabulary_",tissue,".txt"),
       frag.type="",
       preload=FALSE,
       preload.vocab="",
       preload.profiles="")
```

## Arguments

|                         |                                                                                                                                                                                                                                                                                                           |
|-------------------------|-----------------------------------------------------------------------------------------------------------------------------------------------------------------------------------------------------------------------------------------------------------------------------------------------------------|
| <b>kmer</b>             | input kmer, FASTA characters string 5 - 7 bp                                                                                                                                                                                                                                                              |
| <b>tissue</b>           | name of tissue directory of interest                                                                                                                                                                                                                                                                      |
| <b>data.dir</b>         | path to directory containing preprocessed data                                                                                                                                                                                                                                                            |
| <b>pnorm.tag</b>        | tag indicating which background propensities were used for normalisation                                                                                                                                                                                                                                  |
| <b>vocab.flag</b>       | {FALSE, TRUE} flag if a precalculated vocabulary file is present and should be used [default=FALSE]<br>Speeds up the analysis but precalculation is time consuming, therefore has to be done manually after initial processing of new tissue data. Recommended if tissue is frequently used for analysis. |
| <b>vocab.file</b>       | path to precalculated vocabulary file<br>[default=paste0(data.dir,"",tissue,"vocabulary_",tissue,".txt")]                                                                                                                                                                                                 |
| <b>frag.type</b>        | {"DNase", "ATAC"} fragmentation type.                                                                                                                                                                                                                                                                     |
| <b>preload</b>          | flag [FALSE/TRUE] if to use preloaded average profiles [default=FALSE]                                                                                                                                                                                                                                    |
| <b>preload.vocab</b>    | preloaded vocabulary data frame from <code>PreLoadVocab()</code>                                                                                                                                                                                                                                          |
| <b>preload.profiles</b> | two dataframe list with the preloaded profiles from <code>PreLoadProfiles()</code>                                                                                                                                                                                                                        |

## Value

Returns SFR as single numeric value.

## Examples

```
GetSFR(kmer="CACGTG",
       tissue="blood_tissue",
       pnorm.tag="h_ery_1",
       data.dir="./my_sasq_database/human/DNase/",
       vocab.flag=TRUE,
       frag.type="DNase")
```

```
# With preload
data.dir <- "./my_sasq_database/human/DNase/"
tissue <- "blood_tissue"
vocabulary <- PreLoadVocab(data.dir, tissue)

GetSFR(kmer="CACGTG",
       tissue=tissue,
       data.dir=data.dir,
       pnorm.tag="h_ery_1",
       vocab.flag=TRUE,
       frag.type="DNase",
       preload=TRUE,
       preload.vocab=vocabulary)
```

---

## GrepProfile

---

### Description

Grep strand-specific profile of 250 bp surrounding kmer and normalise for total cuts in 250 bp window.

### Usage

```
GrepProfile(kmer, infile, preload=FALSE, preload.profiles.strand="")
```

### Arguments

|                                |                                                                            |
|--------------------------------|----------------------------------------------------------------------------|
| <b>kmer</b>                    | input kmer, FASTA characters string 5 - 7 bp                               |
| <b>infile</b>                  | path to the input file                                                     |
| <b>preload</b>                 | flag: [FALSE/TRUE] if to use preloaded average profiles [default=FALSE]    |
| <b>preload.profiles.strand</b> | dataframe of preloaded profiles from a single strand [e.g. profiles\$plus] |

### Value

Returns list of **..\$profile** and **..\$count**.

### Examples

```
frag.type <- "DNase"
data.dir <- "./my_sasq_database/human/DNase/"
tissue <- "blood_tissue"
pnorm.tag <- "h_ery_1"
kl <- 7

infile.plus=file.path(data.dir, tissue, "counts",
                     paste0("kmers_", kl, "_count_",
                           tissue, "_pnorm_", pnorm.tag, "_plus.txt"))

profile.plus <- GrepProfile(kmer="CACGTG", infile=infile)
```

```
# With preloading
profiles <- PreLoadKmerProfiles(7, data.dir, tissue, pnorm.tag)

profile.plus <- GrepProfile(kmer="CACGTG", infile=infile, preload=TRUE,
                           preload.profiles.strand=profiles$plus )
```

---

## InSilicoMutation

---

### Description

Wrapper for maximum/absolute damage insilico mutation. Takes an input sequence, splits into data frame of desired kmer length matching window sizes for running comparison and compares reference sequence against all possible mutated sequences (single base pair substitutions). Reports according to report mode ("all", "max", "maxabs").

Note that preloading data is highly recommended for speeding up.

(If preload = TRUE and if vocab.flag = FALSE, preload.profiles has to be submitted. If vocab.flag = TRUE with preload = TRUE then preload.vocab has to be submitted.)

### Usage

```
InSilicoMutation(sequence,
  kl=7,
  chr=".",
  position=1,
  report="all",
  damage.mode="exhaustive",
  tissue=tissue,
  data.dir="./my_sasq_database/human/DNase/",
  pnorm.tag,
  vocab.flag=TRUE,
  vocab.file=paste0(data.dir,"/",tissue,"/vocabulary_",tissue,".txt"),
  frag.type=frag.type,
  progress.bar=FALSE,
  preload=FALSE,
  preload.vocab="",
  preload.profiles="")
```

## Arguments

|                         |                                                                                                                                                                                                                                                                                                                                                                                                                                                                         |
|-------------------------|-------------------------------------------------------------------------------------------------------------------------------------------------------------------------------------------------------------------------------------------------------------------------------------------------------------------------------------------------------------------------------------------------------------------------------------------------------------------------|
| <b>sequence1</b>        | input sequence, character string                                                                                                                                                                                                                                                                                                                                                                                                                                        |
| <b>kl</b>               | length of the kmer windows, to split up the sequence                                                                                                                                                                                                                                                                                                                                                                                                                    |
| <b>chr</b>              | chromosome of the sequence to print                                                                                                                                                                                                                                                                                                                                                                                                                                     |
| <b>position</b>         | bp position of the sequence to print, first mutated base is the kl'th base. Therefore input +/- 6 bp positions of sequence surrounding your sequence of interest and set position to the kl'th index.                                                                                                                                                                                                                                                                   |
| <b>report</b>           | <p>{ "all", "max", "maxabs" } Select which damage per position to report. [default="all"]</p> <p><b>"all"</b> = report all 3 possible substitutions per position. Reports three rows per bp position.</p> <p><b>"max"</b> = only report substitution with highest positive damage. Report one row per bp position, easy to convert to wig.</p> <p><b>"maxabs"</b> = only report substitution with highest absolute damage. Reports one row per bp position as well.</p> |
| <b>damage.mode</b>      | <p>{ "exhaustive", "local" } mode to calculate the total damage for the comparison.</p> <p><b>"exhaustive"</b> sum over all pair-wise comparison. <b>"local"</b> extract the highest pair-wise damage score. [default="exhaustive"]</p>                                                                                                                                                                                                                                 |
| <b>tissue</b>           | name of tissue directory of interest                                                                                                                                                                                                                                                                                                                                                                                                                                    |
| <b>data.dir</b>         | path to directory containing preprocessed data                                                                                                                                                                                                                                                                                                                                                                                                                          |
| <b>pnorm.tag</b>        | tag indicating which background propensities were used for normalisation                                                                                                                                                                                                                                                                                                                                                                                                |
| <b>vocab.flag</b>       | <p>{ FALSE, TRUE } flag if a precalculated vocabulary file is present and should be used [default=FALSE]</p> <p>Speeds up the analysis but precalculation is time consuming, therefore has to be done manually after initial processing of new tissue data. Recommended if tissue is frequently used for analysis.</p>                                                                                                                                                  |
| <b>vocab.file</b>       | <p>path to precalculated vocabulary file</p> <p>[default=paste0(data.dir,"",tissue,"vocabulary_",tissue,".txt")]</p>                                                                                                                                                                                                                                                                                                                                                    |
| <b>frag.type</b>        | { "DNase", "ATAC" } fragmentation type.                                                                                                                                                                                                                                                                                                                                                                                                                                 |
| <b>progress.bar</b>     | <p>{ FALSE, TRUE } Select if to display a progress.bar when running. (Requires packages pbapply if set to TRUE!) [default=FALSE]</p>                                                                                                                                                                                                                                                                                                                                    |
| <b>preload</b>          | flag [FALSE/TRUE] if to use preloaded average profiles [default=FALSE]                                                                                                                                                                                                                                                                                                                                                                                                  |
| <b>preload.vocab</b>    | preloaded vocabulary data frame from PreLoadVocab()                                                                                                                                                                                                                                                                                                                                                                                                                     |
| <b>preload.profiles</b> | two dataframe list with the preloaded profiles from PreLoadProfiles()                                                                                                                                                                                                                                                                                                                                                                                                   |

## Value

Seven columns dataframe c(chr, position, ref.base, var.base, ref.sequence, var.sequence, damage).

## Examples

```
# use (for example) the BSgenome package to extract reference genome sequence
library(BSgenome)
library(BSgenome.Hsapiens.UCSC.hg18)
genome <- BSgenome.Hsapiens.UCSC.hg18

#set the sequence coordinates of the desired genomic location
chr <- "chr16"
start.pos <- 145852
end.pos <- start.pos + 30

# Get the sequence sequence
seq <- as.character(getSeq(genome, "chr16", start=start.pos-6, end=end.pos+6))
```

```

data.dir <- "./my_sasq_database/human/DNase/"
tissue <- "blood_tissue"
vocabulary <- PreLoadVocab(data.dir, tissue)

#perform the in silico mutation
df.insilico <- InSilicoMutation(sequence=seq,
                                kl=7,
                                chr="chr16",
                                position=start.pos,
                                report="all",
                                damage.mode="exhaustive",
                                tissue=tissue,
                                pnorm.tag="h_ery_1",
                                data.dir=data.dir,
                                vocab.flag=TRUE,
                                frag.type=frag.type,
                                progress.bar = TRUE,
                                preload=TRUE,
                                preload.vocab=vocabulary
                                )

#display as InSilicoMutationplot
rp <- InSilicoMutationPlot(df.insilico, ylim=c(-4,4))

```

---

## InSilicoMutationPlot

---

### Description

Make a InSilicoMutation plot from data frame as output from InSilicoMutation. Must have been run with report="all"

### Usage

```
InSilicoMutationPlot(df, ylim=c(-2,2))
```

### Arguments

**df** data frame as output from InSilicoMutation (report="all")  
**ylim** y-limits for plot[default=c(-2,2)]

### Value

Returns ggplot2 plot object containing the InSilicoMutationplot.

### Examples

```

# use (for example) the BSgenome package to extract reference genome sequence
library(BSgenome)
library(BSgenome.Hsapiens.UCSC.hg18)
genome <- BSgenome.Hsapiens.UCSC.hg18

```

```

#set the sequence coordinates of the desired genomic location
chr <- "chr16"
start.pos <- 145852
end.pos <- start.pos + 30

# Get the sequence sequence
seq <- as.character(getSeq(genome, "chr16", start=start.pos-6, end=end.pos+6))

#perform the i silcio mutation
df.insilico <- InSilicoMutation(sequence=seq,
                                kl=7,
                                chr="chr16",
                                position=start.pos,
                                report="all",
                                damage.mode="exhaustive",
                                tissue="blood_tissue",
                                data.dir="./my_sasq_database/human/DNase/",
                                vocab.flag=TRUE,
                                frag.type=frag.type,
                                progress.bar = TRUE
                                )

#display as InSilicoMutationplot
rp <- InSilicoMutationPlot(df.insilico, ylim=c(-4,4))

```

---

## MakeInSilicoMutationTrackHub

---

### Description

Wrapper to make a UCSC browser track hub from the insilico mutation data frame. Input is a data frame in the same format as the output data frame of the InSilicoMutation function. 7 columns: chr pos ref.base var.base ref.seq var.seq damage

### Usage

```

MakeInSilicoMutationTrackHub(input.df,
                              id.tag = "SasQ_RP",
                              store.tracks = paste0("~/", id.tag, "_tracks"),
                              store.hub = paste0("~/", id.tag, "_track_hub"),
                              genome.build = "hg19",
                              path.chr.sizes,
                              short.label = "SasQ In silico mutation InSilicoMutation plot",
                              long.label = "",
                              set.email = "none",
                              bedgraph.to.bigwig.path,
                              make.softlinks = FALSE)

```

## Arguments

|                                |                                                                                                                                                                                                                                                                                                                                                                                                                                                                                                        |
|--------------------------------|--------------------------------------------------------------------------------------------------------------------------------------------------------------------------------------------------------------------------------------------------------------------------------------------------------------------------------------------------------------------------------------------------------------------------------------------------------------------------------------------------------|
| <b>input.df</b>                | input 7 column data frame. chr pos ref.base var.base ref.seq var.seq damage                                                                                                                                                                                                                                                                                                                                                                                                                            |
| <b>id.tag</b>                  | id tag to name the hub directory and bw tracks.                                                                                                                                                                                                                                                                                                                                                                                                                                                        |
| <b>store.tracks</b>            | path to directory to store the bigwig tracks.                                                                                                                                                                                                                                                                                                                                                                                                                                                          |
| <b>store.hub</b>               | where to store the hub & visualization folder.                                                                                                                                                                                                                                                                                                                                                                                                                                                         |
| <b>genome.build</b>            | select genome build ("hg19", "hg18", "mm9", ...) [default="hg19"]                                                                                                                                                                                                                                                                                                                                                                                                                                      |
| <b>path.chr.sizes</b>          | full.path to chr sizes file matching to the selected genome. Not provided in package.                                                                                                                                                                                                                                                                                                                                                                                                                  |
| <b>short.label</b>             | shortLabel for track hub.                                                                                                                                                                                                                                                                                                                                                                                                                                                                              |
| <b>long.label</b>              | longLabel for track hub [default = short.label]                                                                                                                                                                                                                                                                                                                                                                                                                                                        |
| <b>set.email</b>               | email contact address to appear in trackHub. [default="none"]                                                                                                                                                                                                                                                                                                                                                                                                                                          |
| <b>bedgraph.to.bigwig.path</b> | full path to UCSC bedGraphToBigWig conversion tool. Not included.                                                                                                                                                                                                                                                                                                                                                                                                                                      |
| <b>make.softlinks</b>          | {FALSE, TRUE} set flag if to directly make softlinks in hub folder [default=FALSE]<br>(e.g. set TRUE if running directly on a cluster so that the final softlinks paths are already correct<br>[default = FALSE] if data files will be copied to a different direction afterwards (e.g. when mounted and ran locally)<br>if FALSE: After creation copy data hub to desired location and create softlinks in the hub folder to the tracks in the track folder e.g. "ln -s store.tracks/*.bw store.hub") |

## Value

Writes bigWig tracks into desired directory and creates a trackHub structure to migrate to public domain and import to UCSC.

## Examples

```
frag.type <- "DNase"
data.dir <- "./my_sasq_database/human/DNase/"
tissue <- "blood_tissue"

# use (for example) the BSgenome package to extract reference genome sequence
library(BSgenome)
library(BSgenome.Hsapiens.UCSC.hg18)
genome <- BSgenome.Hsapiens.UCSC.hg18

#set the sequence coordinates of the desired genomic location
chr <- "chr16"
start.pos <- 145852
end.pos <- start.pos + 30

# Get the sequence sequence
seq <- as.character(getSeq(genome, "chr16", start=start.pos-6, end=end.pos+6))

#perform the in silico mutation
df.insilico <- InSilicoMutation(sequence=seq,
                                kl=7,
                                chr="chr16",
                                position=start.pos,
```



```

        report="all",
        damage.mode="exhaustive",
        tissue="blood_tissue",
        data.dir=data.dir,
        vocab.flag=TRUE,
        frag.type=frag.type,
        progress.bar = TRUE
    )

out.dir <- "./myoutputpath/"

# write InSilicoMutationplot ucsc track hub
MakeInSilicoMutationTrackHub(
    input.df = df.insilico,
    id.tag = "SasQ_hub_blood",
    store.tracks = paste0(out.dir, "/", id.tag, "_tracks"),
    store.hub = paste0(out.dir, "/", id.tag, "_track_hub"),
    genome.build = "hg19",
    path.chr.sizes = "~/mydatabase/chrom_sizes/hg19_chrom_sizes.txt",
    short.label = "SasQ In silico mutation InSilicoMutation plot",
    bedgraph.to.bigwig.path = "~/mytools/tools/bedGraphToBigWig",
    make.softlinks = FALSE
)

```

---

## PlotOverlap

---

### Description

Plot two average profiles overlapping or on top of each other given two input profiles. Plot the shoulders if plot.shoulders is set to TRUE, then use shoulders list as provided or determine.

### Usage

```

PlotOverlap(profile1,
            profile2,
            kmer1,
            kmer2,
            count1 = "NA",
            count2 = "NA",
            ymode = "separate",
            ylim = c(0,0.01),
            xlim = c(-125,125),
            plot.shoulders=FALSE,
            shoulders1=FALSE,
            shoulders2=FALSE)

```

## Arguments

|                       |                                                                                                                                                                                     |
|-----------------------|-------------------------------------------------------------------------------------------------------------------------------------------------------------------------------------|
| <b>profile1</b>       | input profile1, retrieved from the GetFootprint() function as list entry ...\$profile                                                                                               |
| <b>profile2</b>       | input profile2, retrieved from the GetFootprint() function as list entry ...\$profile                                                                                               |
| <b>kmer1</b>          | input k-mer 1 (reference)                                                                                                                                                           |
| <b>kmer2</b>          | input k-mer 2 (variant)                                                                                                                                                             |
| <b>count1</b>         | count of k-mer1 occurrence                                                                                                                                                          |
| <b>count2</b>         | count of k-mer2 occurrence                                                                                                                                                          |
| <b>ymode</b>          | mode how to plot the overlapping profiles ("merged" or as "separate" profiles above each other) [default=separate]                                                                  |
| <b>ylim</b>           | ylim to fix for plot [default c(0, 0.01))]                                                                                                                                          |
| <b>xlim</b>           | xlim to fix for plot [default c(-125, 125)]                                                                                                                                         |
| <b>plot.shoulders</b> | FALSE, TRUE if to plot the estimated shoulders with the profiles [default=FALSE]<br>note that it is only plotted if the separate profile option was selected to keep the plots tidy |
| <b>shoulders1</b>     | list object of estimated shoulder position and ranges for profile 1 [default=FALSE]                                                                                                 |
| <b>shoulders2</b>     | list object of estimated shoulder position and ranges for profile 2 [default=FALSE]                                                                                                 |

## Value

Returns ggplot2 plot object of the overlay plot.

## Examples

```
frag.type <- "DNase"
data.dir <- "./my_sasq_database/human/DNase/"
tissue <- "blood_tissue"

kmer1 <- "WGATAA" #note FASTA ambiguous code is supported
kmer2 <- "WGATTA"

fp1 <- GetFootprint(kmer=kmer1,
                    tissue=tissue,
                    data.dir=data.dir,
                    frag.type=frag.type,
                    smooth=TRUE)
fp2 <- GetFootprint(kmer=kmer2,
                    tissue=tissue,
                    data.dir=data.dir,
                    frag.type=frag.type,
                    smooth=TRUE)

# make an overlap plot
PlotOverlap(
  fp1$profile,
  fp2$profile,
  kmer1,
  kmer2,
  fp1$count,
  fp2$count,
  ymode="separate"
)
```

---

# PlotOverlapKmers

---

## Description

Wrapper function to produce an overlay plot from two kmers and a tissue input only.  
(For plotting: If preload = TRUE preload.profiles has to be submitted.)

## Usage

```
PlotOverlapKmers(kmer1,
                 kmer2,
                 tissue1,
                 tissue2,
                 data.dir,
                 pnorm.tag,
                 frag.type,
                 smooth=TRUE,
                 ylim=c(0,0.01),
                 xlim=c(-125,125),
                 plot.shoulders=FALSE,
                 preload=FALSE,
                 preload.profiles)
```

## Arguments

|                         |                                                                                                                                                                                       |
|-------------------------|---------------------------------------------------------------------------------------------------------------------------------------------------------------------------------------|
| <b>kmer1</b>            | input k-mer 1 (reference)                                                                                                                                                             |
| <b>kmer2</b>            | input k-mer 2 (variant)                                                                                                                                                               |
| <b>tissue1</b>          | name of tissue 1 directory of interest                                                                                                                                                |
| <b>tissue2</b>          | name of tissue 2 directory of interest                                                                                                                                                |
| <b>data.dir</b>         | path to directory containing preprocessed data                                                                                                                                        |
| <b>pnorm.tag</b>        | tag indicating which background propensities were used for normalisation                                                                                                              |
| <b>frag.type</b>        | {"DNase", "ATAC"} fragmentation type.                                                                                                                                                 |
| <b>smooth</b>           | {FALSE TRUE} if to smooth the profiles. [default=TRUE]                                                                                                                                |
| <b>ymode</b>            | mode how to plot the overlapping profiles ("merged" or as "separate" profiles above each other) [default=separate]                                                                    |
| <b>ylim</b>             | ylim to fix for plot [default c(0, 0.01)]                                                                                                                                             |
| <b>xlim</b>             | xlim to fix for plot [default c(-125, 125)]                                                                                                                                           |
| <b>plot.shoulders</b>   | {FALSE, TRUE} if to plot the estimated shoulders with the profiles [default=FALSE]<br>note that it is only plotted if the separate profile option was selected to keep the plots tidy |
| <b>preload</b>          | flag [FALSE/TRUE] if to use preloaded average profiles [default=FALSE]                                                                                                                |
| <b>preload.profiles</b> | two dataframe list with the preloaded profiles from PreLoadProfiles()                                                                                                                 |

## Value

Returns ggplot2 plot object of the overlay plot.

## Examples

```
frag.type <- "DNase"
data.dir <- "./my_sasq_database/human/DNase/"
tissue <- "blood_tissue"

PlotOverlapKmers(
  kmer1="CACGTG",
  kmer2="CACGTT",
  tissue1=tissue,
  tissue2=tissue,
  data.dir=data.dir,
  pnorm.tag="h_ery_1",
  frag.type="DNase",
  smooth=TRUE,
  plot.shoulders=FALSE
)
```

---

## PlotSingle

---

### Description

Plot the average profile plot given an input profile. Plot the shoulders if plot.shoulders is set to TRUE and use shoulders list provided or determine.

### Usage

```
PlotSingle(profile,
  kl=7,
  plot.shoulders=FALSE,
  shoulders=FALSE,
  ylim=c(0,0.01),
  xlim=c(-125,125),
  color="black")
```

### Arguments

|                       |                                                                                     |
|-----------------------|-------------------------------------------------------------------------------------|
| <b>profile</b>        | input profile                                                                       |
| <b>kl</b>             | length of the kmer windows, to split up the sequences                               |
| <b>ylim</b>           | ylim to fix for plot [default=c(0, 0.01)]                                           |
| <b>xlim</b>           | xlim to fix for plot [default=c(-125, 125)]                                         |
| <b>plot.shoulders</b> | {FALSE, TRUE} if to plot the estimated shoulders with the profiles [default=FALSE]  |
| <b>shoulders</b>      | list object of estimated shoulder position and ranges for profile 1 [default=FALSE] |
| <b>color</b>          | Select a color for the profile [default="black"]                                    |

### Value

Returns single ggplot2 plot object of the profile.

## Examples

```
frag.type <- "DNase"
data.dir <- "./my_sasq_database/human/DNase/"
tissue <- "blood_tissue"
kmer <- "CACGTG"

# get the footprint
fp <- GetFootprint(kmer=kmer, tissue=tissue, data.dir=data.dir,
                  frag.type=frag.type, smooth=TRUE)

# estimate the shoulders from the profile
# (use smoothed profile or smooth within call!)
sh <- SobelBorders(fp$profile, kl=nchar(kmer))

# make single, merged profile plot
p <- PlotSingle(profile=fp$profile,
               kl=nchar(kmer),
               plot.shoulders=TRUE,
               shoulders=sh
               )
```

---

## PlotSingleKmer

---

### Description

Wrapper function to produce a plot from kmer and tissue input only.  
(For plotting: If preload = TRUE preload.profiles has to be submitted.)

### Usage

```
PlotSingleKmer(kmer,
               tissue,
               data.dir,
               frag.type,
               pnorm.tag,
               smooth=TRUE,
               smooth.bandwidth=5,
               plot.shoulders=FALSE,
               ylim=c(0,0.01),
               xlim=c(-125,125),
               color="black",
               preload=FALSE,
               preload.profiles)
```

## Arguments

|                         |                                                                                    |
|-------------------------|------------------------------------------------------------------------------------|
| <b>kmer</b>             | input k-mer                                                                        |
| <b>tissue</b>           | name of tissue 1 directory of interest                                             |
| <b>data.dir</b>         | path to directory containing preprocessed data                                     |
| <b>pnorm.tag</b>        | tag indicating which background propensities were used for normalisation           |
| <b>frag.type</b>        | {"DNase", "ATAC"} fragmentation type.                                              |
| <b>smooth</b>           | {FALSE TRUE} if to smooth the profiles. [default=TRUE]                             |
| <b>smooth.bandwidth</b> | bandwidth to smooth in bp [default=5]                                              |
| <b>plot.shoulders</b>   | {FALSE, TRUE} if to plot the estimated shoulders with the profiles [default=FALSE] |
| <b>ylim</b>             | ylim to fix for plot [default c(0, 0.01)]                                          |
| <b>xlim</b>             | xlim to fix for plot [default c(-125, 125)]                                        |
| <b>color</b>            | Select a color for the profile [default="black"]                                   |
| <b>preload</b>          | flag [FALSE/TRUE] if to use preloaded average profiles [default=FALSE]             |
| <b>preload.profiles</b> | two dataframe list with the preloaded profiles from PreLoadProfiles()              |

## Value

Returns single ggplot2 plot object of the profile.

## Examples

```
PlotSingleKmer(kmer="CACGTG",
               tissue="blood_tissue",
               data.dir="./my_sasq_database/human/DNase/",
               frag.type="DNase")
```

---

## PlotSingleStrands

---

### Description

Wrapper function to produce strand specific plots from kmer and tissue input only.

### Usage

```
PlotSingleStrands(kmer,
                  tissue,
                  data.dir,
                  pnorm.tag,
                  frag.type,
                  smooth=TRUE,
                  smooth.bandwidth=5,
                  background.flag=FALSE,
                  ylim=c(0,0.01),
                  xlim=c(-125,125))
```

## Arguments

|                         |                                                                                                                                                                                                                                                                                                                                        |
|-------------------------|----------------------------------------------------------------------------------------------------------------------------------------------------------------------------------------------------------------------------------------------------------------------------------------------------------------------------------------|
| <b>kmer</b>             | input k-mer                                                                                                                                                                                                                                                                                                                            |
| <b>tissue</b>           | name of tissue 1 directory of interest                                                                                                                                                                                                                                                                                                 |
| <b>data.dir</b>         | path to directory containing preprocessed data                                                                                                                                                                                                                                                                                         |
| <b>pnorm.tag</b>        | tag indicating which background propensities were used for normalisation                                                                                                                                                                                                                                                               |
| <b>frag.type</b>        | {"DNase", "ATAC"} fragmentation type.                                                                                                                                                                                                                                                                                                  |
| <b>smooth</b>           | {FALSE TRUE} if to smooth the profiles. [default=TRUE]                                                                                                                                                                                                                                                                                 |
| <b>smooth.bandwidth</b> | bandwidth to smooth in bp [default=5]                                                                                                                                                                                                                                                                                                  |
| <b>background.flag</b>  | FALSE TRUE Select if to visualize the genome-wide background cut profiles or from tissue data. Will adjust the required and queried data structure accordingly.<br>Note that if set to TRUE, a different data directory, that pointing to the storage of the deproteinized, genome-wide background has to be provided. [default=FALSE] |
| <b>ylim</b>             | ylim to fix for plot [default c(0, 0.01)]                                                                                                                                                                                                                                                                                              |
| <b>xlim</b>             | xlim to fix for plot [default c(-125, 125)]                                                                                                                                                                                                                                                                                            |

## Value

Returns list of strand-specific profile plots: for plus **...\$plot.plus** and minus strand **...\$plot.minus**.

## Examples

```
PlotSingleStrands(kmer="WGATAA",
                  tissue = "blood_tissue",
                  data.dir = "./my_sasq_database/human/DNase/",
                  pnorm.tag = "h_ery_1",
                  frag.type = "DNase")
```

---

## PreLoadProfiles

---

### Description

Preload the entire kmer based average profiles for a given tissue and kmer size.

### Usage

```
PreLoadKmerProfiles(kl, data.dir, tissue, pnorm.tag)
```

## Arguments

|                  |                                                                          |
|------------------|--------------------------------------------------------------------------|
| <b>kl</b>        | length of the kmer windows, to split up the sequences                    |
| <b>tissue</b>    | name of tissue 1 directory of interest                                   |
| <b>data.dir</b>  | path to directory containing preprocessed data                           |
| <b>pnorm.tag</b> | tag indicating which background propensities were used for normalisation |

## Value

List of length two ...\$plus and ...\$minus storing the occurrences and cut profiles per k-mer. Each list entry is a data frame with the following dimension:

Column[1] = kmer, Column[2] = kmer occurrence, Column[3 - (300+kl+2)] = 300 bp + kl kmer surrounding profile. Rows = number of possible kmers of length kl

Note that we store the 300 kmer surrounding bases but only query and process the surrounding 250 bp window. We kept the stroing at 300 bp to be quickly able to expand our scripts. All functions process the described 250 surrounding window from this start files.

## Examples

```
kl <- 7

data.dir <- "./my_sasq_database/human/DNase/"

tissue <- "blood_tissue"

pnorm.tag <- "h_ery_1"

profiles <- PreLoadProfiles(data.dir, tissue)
```

---

## PreLoadVocab

---

### Description

Preload the entire tissue specific vocabulary file with preprocessed SFRs for every possible k-mer.

### Usage

```
PreLoadVocab(data.dir, tissue)
```

### Arguments

**tissue** name of tissue 1 directory of interest  
**data.dir** path to directory containing preprocessed data

## Value

Vocabulary file loaded as two column data frame.

## Examples

```
data.dir <- "./my_sasq_database/human/DNase/"

tissue <- "blood_tissue"

vocabulary <- PreLoadVocab(data.dir, tissue)
```



## PruneProfile

---

### Description

Prune an retrieved (250 bp) average profile equally from both directions given the profile and the desired window size around the kmer which to retrieve. Requires an even number as length to prune. Length of the output profile will always be (desired.length + kmer.length).

### Usage

```
PruneProfile(profile, desired.length)
```

### Arguments

|                       |                                                              |
|-----------------------|--------------------------------------------------------------|
| <b>profile</b>        | input profile                                                |
| <b>desired.length</b> | length of to prune to (will be desired.length + kmer.length) |

### Value

Returns pruned profile as numeric vector.

### Examples

```
frag.type <- "DNase"
data.dir <- "./my_sasq_database/human/DNase/"
tissue <- "blood_tissue"
kmer <- "CACGTG"

# get the footprint
fp <- GetFootprint(kmer=kmer, tissue=tissue, data.dir=data.dir,
                  frag.type=frag.type, smooth=TRUE)

#prune
pruned.profile <- PruneProfile(fp$profile, 100)
```

---

## QueryJaspar

---

### Description

Take a sequence input and query it against a set of Jaspar2014 PWMs. (as provided or saved from the JASPAR2014 R package). Requires "Biostrings" and "TFBSTools" packages.

### Usage

```
QueryJaspar(sequence, threshold=0.8, pwm.data)
```

## Arguments

**sequence** input sequence  
**threshold** relative percentage score threshold above which to report matches [default=0.8]  
**pwm.data** a stored pwm.RData object as provided with the Sasquatch distribution or as retrieved and saved from JASPAR2014 R package

## Value

Returns character string listing the PWM matches above the relative percentage score threshold.

## Examples

```
#requires Biostrings and TFBSTools R packages
library(Biostrings)
library(TFBSTools)

#load human.pwm object
load("./my_sasq_database/jaspar/jaspar2014.human.9606.all.versions")

# Single JASPAR query
QueryJaspar(sequence="AGATAATAG", threshold=0.8, pwm.data=human.pwm)
```

---

## QueryJasparBatch

---

### Description

Take a data frame from the RefVarBatch query as input and query it against the set of selected Jaspas2014 PWMs using a selected match.threshold. Select an absolute footprinting damage above which to query jasper.

### Usage

```
QueryJasparBatch(df, damage.threshold=0, match.threshold=0.8, pwm.data)
```

## Arguments

**df** 9 column data frame as output from RefVarBatch()  
**damage.threshold** absolute predicted footprinting damage above which a sequence should be selected for the query. [default=0, query all]  
**match.threshold** relative percentage score threshold above which to report matches [default=0.8]  
**pwm.data** a stored pwm.RData object as provided with the Sasquatch distribution or as retrieved and saved from JASPAR2014 R package

## Value

Returns data frame with additional column for jasper query results.

## Examples

```
#ty example data frame
tdf <- data.frame(
  id=c("1", "2", "3"),
  ref=c("ATAGATAATCGCT", "ATAGATAATCGCT", "ATATATTCTCGCT"),
  var=c("ATAGATCATCGCT", "ATAGATTATCGCT", "ATAGATGATCGCT")
)

#make a reference vs. variant batch query
comp.df <- RefVarBatch(ref.var.df=tdf,
  kl=7,
  damage.mode="exhaustive",
  tissue="blood_tissue",
  data.dir="./my_sasq_database/human/DNase/",
  vocab.flag=TRUE,
  frag.type="DNase")

#requires Biostrings and TFBSTools R packages
library(Biostrings)
library(TFBSTools)

#load human.pwm object
load("./my_sasq_database/jaspar/jaspar2014.human.9606.all.versions")

#query refvar data frame against jaspar pwms
comp.df.jaspar <- QueryJasparBatch(df=comp.df,
  damage.threshold=0.3,
  match.threshold=0.8,
  pwm.data=human.pwm)
```

---

## QueryLongSequence

---

### Description

Wrapper function to split a longer sequence into kmers of length `kl` and return kmer, SFR and plots if specified. (If `preload = TRUE` and if `vocab.flag = FALSE`, `preload.profiles` has to be submitted. If `vocab.flag = TRUE` with `preload = TRUE` then `preload.vocab` has to be submitted.)

### Usage

```
QueryLongSequence(sequence,
  kl,
  tissue,
  data.dir,
  pnorm.tag,
  vocab.flag=FALSE,
  vocab.file=paste0(data.dir,"/",tissue,
    "/vocabulary_",tissue,".txt"),
  frag.type,
  plots=FALSE,
  smooth=TRUE,
```

```

plot.shoulders=TRUE,
ylim=c(0,0.01),
xlim=c(-125,125),
preload=FALSE,
preload.vocab="",
preload.profiles="")

```

## Arguments

|                         |                                                                                                                                                                                                    |
|-------------------------|----------------------------------------------------------------------------------------------------------------------------------------------------------------------------------------------------|
| <b>sequence</b>         | input sequence, character string                                                                                                                                                                   |
| <b>kl</b>               | length of the kmer windows, to split up the sequence                                                                                                                                               |
| <b>tissue</b>           | name of tissue directory of interest                                                                                                                                                               |
| <b>data.dir</b>         | path to directory containing preprocessed data                                                                                                                                                     |
| <b>pnorm.tag</b>        | tag indicating which background propensities were used for normalisation                                                                                                                           |
| <b>vocab.flag</b>       | {FALSE, TRUE} flag if a precalculated vocabulary file is present and should be used [default=FALSE]                                                                                                |
|                         | Speeds up the analysis but precalculation is time consuming, therefore has to be done manually after initial processing of new tissue data. Recommended if tissue is frequently used for analysis. |
| <b>vocab.file</b>       | path to precalculated vocabulary file<br>[default=paste0(data.dir,"",tissue,"vocabulary_",tissue,".txt")]                                                                                          |
| <b>frag.type</b>        | {"DNase", "ATAC"} fragmentation type.                                                                                                                                                              |
| <b>plots</b>            | {FALSE, TRUE} indicate if to plot a profile per kmer [default=FALSE]                                                                                                                               |
| <b>smooth</b>           | {FALSE, TRUE} smooth the profile [default=TRUE]                                                                                                                                                    |
| <b>plot.shoulders</b>   | {FALSE, TRUE} print the estimated shoulders with the plots [default=TRUE]                                                                                                                          |
| <b>ylim</b>             | y-limit for plots [default c(0,0.01)]                                                                                                                                                              |
| <b>xlim</b>             | x-limit for plots [default c(-125,125)]                                                                                                                                                            |
| <b>preload</b>          | flag [FALSE/TRUE] if to use preloaded average profiles [default=FALSE]                                                                                                                             |
| <b>preload.vocab</b>    | preloaded vocabulary data frame from PreLoadVocab()                                                                                                                                                |
| <b>preload.profiles</b> | two dataframe list with the preloaded profiles from PreLoadProfiles()                                                                                                                              |

## Value

Returns `...$df` a data frame listing the splitted kmers with the respective SFR.  
`...$plots` if specified list of profile plots with one plot per splitted k-mer.

## Examples

```

QueryLongSequence(sequence="ATAGATAATCGCT",
  kl,
  tissue="blood_tissue",
  pnorm.tag="h_ery_1",
  data.dir="./my_sasq_database/human/DNase/",
  vocab.flag=FALSE,
  vocab.file=paste0(data.dir,"/",tissue,
                    "/vocabulary_",tissue,".txt"),
  frag.type="DNase",
  plots=FALSE)

# With preload
data.dir <- "./my_sasq_database/human/DNase/"
tissue <- "blood_tissue"
vocabulary <- PreLoadVocab(data.dir, tissue)

```

```
QueryLongSequence(sequence="ATAGATAATCGCT",
                  kl,
                  tissue=tissue,
                  pnorm.tag="h_ery_1",
                  data.dir=data.dir,
                  vocab.flag=TRUE,
                  vocab.file=paste0(data.dir,"/",tissue,
                                   "/vocabulary_",tissue,".txt"),
                  frag.type="DNase",
                  plots=FALSE,
                  preload=TRUE,
                  preload.vocab=vocabulary)
```

---

## RefVarBatch

---

### Description

Wrapper function to analyse multiple Ref-Var-Sequence pairs. Split each sequence into kmers of length `kl`, get their SFRs (ideally for speed from `vocab.file` or calculate per instance. Calculate the damage associated with each kmer pair and from that the local or the exhaustive summed up damage of entire sequence pair.

(If `preload = TRUE` and if `vocab.flag = FALSE`, `preload.profiles` has to be submitted. If `vocab.flag = TRUE` with `preload = TRUE` then `preload.vocab` has to be submitted.)

### Usage

```
RefVarBatch(ref.var.df,
            kl,
            damage.mode="exhaustive",
            tissue,
            data.dir,
            pnorm.tag,
            vocab.flag=FALSE,
            vocab.file=paste0(data.dir,"/",tissue,"/vocabulary_",tissue,".txt"),
            frag.type,
            preload=FALSE,
            preload.profiles="",
            preload.vocab="")
```

## Arguments

|                         |                                                                                                                                                                                                                                                                                                           |
|-------------------------|-----------------------------------------------------------------------------------------------------------------------------------------------------------------------------------------------------------------------------------------------------------------------------------------------------------|
| <b>ref.var.df</b>       | three column data frame listing id reference and variance sequence (id reference variant)                                                                                                                                                                                                                 |
| <b>kl</b>               | length of the kmer windows, to split up the sequences                                                                                                                                                                                                                                                     |
| <b>damage.mode</b>      | { <b>"exhaustive"</b> , <b>"local"</b> } mode to calculate the total damage for the comparison. <b>"exhaustive"</b> sum over all pair-wise comparison. <b>"local"</b> extract the highest pair-wise damage score. [default= <b>"exhaustive"</b> ]                                                         |
| <b>tissue</b>           | name of tissue directory of interest                                                                                                                                                                                                                                                                      |
| <b>data.dir</b>         | path to directory containing preprocessed data                                                                                                                                                                                                                                                            |
| <b>pnorm.tag</b>        | tag indicating which background propensities were used for normalisation                                                                                                                                                                                                                                  |
| <b>vocab.flag</b>       | {FALSE, TRUE} flag if a precalculated vocabulary file is present and should be used [default=FALSE]<br>Speeds up the analysis but precalculation is time consuming, therefore has to be done manually after initial processing of new tissue data. Recommended if tissue is frequently used for analysis. |
| <b>vocab.file</b>       | path to precalculated vocabulary file<br>[default=paste0(data.dir,"",tissue,"vocabulary_",tissue,".txt")]                                                                                                                                                                                                 |
| <b>frag.type</b>        | { <b>"DNase"</b> , <b>"ATAC"</b> } fragmentation type.                                                                                                                                                                                                                                                    |
| <b>preload</b>          | flag [FALSE/TRUE] if to use preloaded average profiles [default=FALSE]                                                                                                                                                                                                                                    |
| <b>preload.vocab</b>    | preloaded vocabulary data frame from PreLoadVocab()                                                                                                                                                                                                                                                       |
| <b>preload.profiles</b> | two dataframe list with the preloaded profiles from PreLoadProfiles()                                                                                                                                                                                                                                     |

## Value

Returns data frame listing Ref and Var sequence with highest scoring kmer pair and according SFRs and calculated (exhaustive or local) total damage.

## Examples

```
#ty example data frame
tdf <- data.frame(
  id=c("1", "2", "3"),
  ref=c("ATAGATAATCGCT", "ATAGATAATCGCT", "ATATATTCTCGCT"),
  var=c("ATAGATCATCGCT", "ATAGATTATCGCT", "ATAGATGATCGCT")
)

# Make a reference vs. variant batch query
comp.df <- RefVarBatch(ref.var.df=tdf,
  kl=7,
  damage.mode="exhaustive",
  tissue="blood_tissue",
  data.dir="./my_sasq_database/human/DNase/",
  pnorm.tag="h_ery_1",
  vocab.flag=TRUE,
  frag.type="DNase")

# With Preload
data.dir <- "./my_sasq_database/human/DNase/"
tissue <- "blood_tissue"
vocabulary <- PreLoadVocab(data.dir, tissue)
comp.df <- RefVarBatch(ref.var.df=tdf,
  kl=7,
  damage.mode="exhaustive",
  tissue="blood_tissue",
```

```
data.dir="./my_sasq_database/human/DNase/",
pnorm.tag="h_ery_1",
vocab.flag=TRUE,
frag.type="DNase",
preload=TRUE,
preload.vocab=vocabulary)
```

---

## SmoothProfile

---

### Description

Helper function to smooth a profile given the specified bandwidth and a gaussian, normal kernel.

### Usage

```
SmoothProfile(profile, bandwidth=5)
```

### Arguments

|                         |                                       |
|-------------------------|---------------------------------------|
| <b>profile</b>          | input profile (numeric vector)        |
| <b>smooth.bandwidth</b> | bandwidth to smooth in bp [default=5] |

### Value

Returns smoothed profile as numeric vector.

### Examples

```
fp <- GetFootprint(kmer="CACGTG",
  tissue="blood_tissue",
  data.dir="./my_sasq_database/human/DNase/",
  frag.type="DNase",
  smooth=FALSE)

smoothed.profile <- SmoothProfile(fp$profile, 5)
```

---

## SobelBorders

---

### Description

Estimate the footprint shoulders by based on zero crossings of the 1D 1st derivative approximation of a smoothed profile and get the optimal shoulder range that maximizes the SFRatio of the footprint. (Approximations for speeding up the process are: Estimate the optimal positions based on 6 bp wide shoulders. Then optimize the shoulder width/range with allowed ranges in {4,6,8,10})

### Usage

```
SobelBorders(profile, kl)
```

## Arguments

**profile** input profile (numeric vector) has to be smoothed for proper function!  
**kl** {5,6,7} kmer length input

## Value

Returns list object containing the shoulder centric positions and their ranges.

..**\$us** upstream shoulder center  
..**\$ds** downstream shoulder center  
..**\$us.range** width/range of upstream shoulder  
..**\$ds.range** width/range of downstream shoulder  
..**\$flag** flag {TRUE FALSE} if shoulders could be estimated

## Examples

```
# get the footprint
fp <- GetFootprint(kmer="CACGTG",
                   tissue="blood_tissue",
                   data.dir="./my_sasq_database/human/DNase/",
                   frag.type="DNase",
                   smooth=TRUE)

# estimate the shoulders from the profile
# (use smoothed profile or smooth within call!)
sh <- SobelBorders(fp$profile, kl=nchar(kmer))
```

---

## Sobeln

---

### Description

Helper function to calculate 1D 1st derivative approximation of profile by 1D sobel filtering.

### Usage

```
Sobeln(profile)
```

## Arguments

**profile** input profile (numeric vector) should be smoothed!

## Value

Returns 1D 1st derivative approximation of the profile as numeric vector.



## Examples

```
fp <- GetFootprint(kmer="CACGTG",  
                  tissue="blood_tissue",  
                  data.dir="./my_sasq_database/human/DNase/",  
                  frag.type="DNase",  
                  smooth=TRUE)  
  
# estimate the shoulders from the profile  
# (use smoothed profile or smooth within call!)  
approx.1st.deriv.prof<- SobelN(fp$profile)
```
